# Supplementary material for: Selective magnetic resonance imaging of antibiotic-resistant bacteria leveraging ATP-binding cassette sugar transporter-responsive probes
Source: Research Square preprint supplement (doi:10.21203/rs.3.rs-5646556/v1), 2025-01-10
Supplement: Supplementary file 1 [file dae46124d9c0c90810be204b.docx]

**SUPPLEMENTARY INFORMATION**

**Selective magnetic resonance imaging of antibiotic-resistant bacteria leveraging ATP-binding cassette sugar transporter-responsive probes**

Mengna Zhu,1, ‡ Yadan Zhao,1, ‡ Jiawei Zhang,1, ‡ Pengcheng Wang,1 Jialiang Zhang,4 Yingying Zhao,5 Xing Lu,1 Bin Song,1, * Houyu Wang,1, * & Yao He 1, 2, 3, *

1 Suzhou Key Laboratory of Nanotechnology and Biomedicine, Institute of Functional Nano & Soft Materials & Collaborative Innovation Center of Suzhou Nano Science and Technology (NANO-CIC), Soochow University, Suzhou 215123, China

2 Macao Translational Medicine Center, Macau University of Science and Technology, Taipa 999078, Macau SAR, China

3 Macao Institute of Materials Science and Engineering, Macau University of Science and Technology, Taipa 999078, Macau SAR, China

4 Department of Radiology, the Fourth Affiliated Hospital of Soochow University, Suzhou, Jiangsu 215000, China

5 Department of Ultrasound, the First Affiliated Hospital of Soochow University,

Suzhou, Jiangsu 215006, China

* Corresponding authors. Email: bsong@suda.edu.cn; houyuwang@suda.edu.cn; yaohe@suda.edu.cn

‡ These authors contributed equally to this work.

**ABBREVIATIONS**

Ac………………………………………………………………………………Acetyl

Ac2O…………………………………………………………………Acetic anhydride

ARPE……………………………………………………Human retinal epithelial cells

BF3…………………………………………………………………Boron trifluorid

C………………………………………………………………………………Carbon

CDCl3…………………………………………………………Deuterated chloroform

CFU………………………………………………………………Colony forming unit

CLSM…………………………………………Confocal laser scanning microscope

CT26……………………………………………………………Colorectal cancer cells

CuI………………………………………………………………………Copper iodide

DCM/CH2Cl2……………………………………Dichloromethane/Methylene chloride

DIPEA……………………………………………………*N,N*-Diisopropylethylamine

DLS…………………………………………………………Dynamic light scattering

DMF…………………………………………………………*N*, *N*-Dimethylformamide

DMSO………………………………………………………………Dimethylsulfoxide

EtOAc…………………………………………………………………Ethyl acetate

H………………………………………………………………………………Proton

HCl…………………………………………………………………Hydrogen chloride

H&E……………………………………………………………[Hematoxylin and Eosin](https://www.so.com/link?m=ebzUBxlMYqz2yegYPjGaj4063cZd5kDeP979RH0PdS/pyFhcEeR+DUm7vsQYoYPXhdmY3FMlL0PEUPDNxTORZlr2F0MkoA3DIsjn5L/phv4kvp2sDg65h4owx0LGxqNQHAeaobJ2Fi1+bqPdl9ak2558hGo3xPJPL" \t "https://www.so.com/_blank)

H2O………………………………………………………………………………Water

HRMS……………………………………………High-resolution mass spectrometry

Hz………………………………………………………………………………Hertz

K2CO3…………………………………………………………Potassium carbonate

LiOH………………………………………………………………Lithium hydroxide

M……………………………………………………………………………….. Molar

MCF-7…………………………………………………… Human breast cancer cells

mL……………………………………………………………………………Milliliter

MDR *E. coli*……………………………………Multidrug-resistant *Escherichia coli*

Mn…………………………………………………………………………Manganese

Mn(CH3COO)2·4H2O………………………………[Manganese(Ⅱ)acetate tetrahydrate](https://www.chemsrc.com/en/cas/15243-27-3_1464065.html)

mREC…………………………………………………Mouse retinal endothelial cells

MRI………………………………………………………Magnetic resonance imaging

MRSA……………………………………Methicillin-resistant *Staphylococcus aureus*

Na2CO3………………………………………………………………Sodium carbonate

NaSO4………………………………………………………………Sodium sulfate

NMR………………………………………………………Nuclear magnetic resonance

N2……………………………………………………………………………Nitrogen

PBS…………………………………………………………Phosphate-buffered saline

PCR…………………………………………………………Polymerase chain reaction

Py………………………………………………………………………………Pyridine

TEA……………………………………………………………………Triethyl amine

TEM………………………………………………Transmission electron microscope

TMS………………………………………………………………Tertramethyl silane

TLC………………………………………………………Thin layer chromatography

UV…………………………………………………………………………Ultraviolet

µL…………………………………………………………………………Micro litter

**EXPERIMENTAL PROCEDURES**

1H-NMR spectra were recorded in either CDCl3 or DMSO on a Varian 400 spectrometer equipped with a Sun workstation at 300 K. TMS (δ (ppm)H = 0.00) was used as the internal reference. Chemical shifts are reported in ppm, and multiplicities are indicated by s (singlet), d (doublet), t (triplet), q (quartet), dd (doublet of doublets), and m (multiplet). The coupling constants, J, are reported in hertz. High-resolution mass spectra were obtained on a AB SCIEX TOF/TOF 5800 system and are reported as m/z (relative intensity). Accurate masses are reported for the molecular ion (M+) or a suitable fragment ion.

Fluorescence spectroscopic studies were performed using a Hitachi (F-4700) spectrofluorometer. Chemicals were purchased from Aladdin or Sigma‒Aldrich and used without further purification. All the solvents were purified via standard methods. Flash chromatography was carried out using silica gel (230--400 mesh). All reactions were performed under anhydrous conditions under N2 and monitored by TLC. Detection was accomplished by examination under UV light (254 nm).

The Gaussian 161 software package was used for all the geometry optimizations at b3lyp/def2SVP. The independent gradient model based on Hirshfeld partition (IGMH) calculations was performed for MT-MnHPs and (MT)2-MnHPs via Multiwfn and plotted via VMD.

Calculation of the signal‒to-noise ratios (SNRs) and ΔSNRs of the MR images.

SNR = *SI mean*/*SD noise* (1)

ΔSNR (%) = (*SNR sample*- *SNR water*)/*SNR water*× 100% (2)

**Synthesis of azide-functionalized maltotriose 1 (Supplementary Fig. 1)**


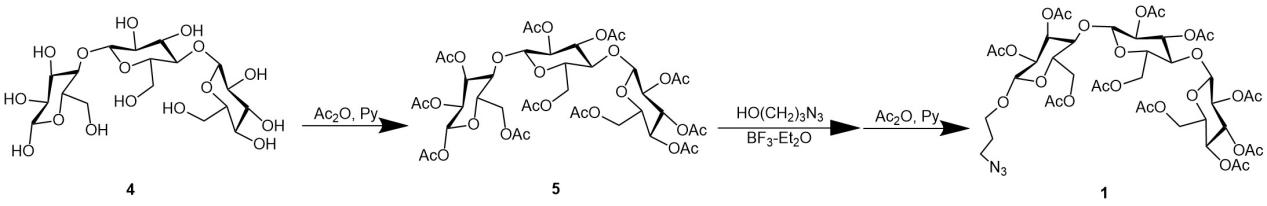


**Supplementary Fig. 1. Synthesis of azide-functionalized maltotrioside (1).**

*Synthesis of (3R,4R,5R,6R)-6-(acetoxymethyl)-5,5-(((3R,4R,5R,6R)-3,4-diacetoxy-6-(acetoxymethyl)-5-(((3R,4R,5R,6R)-3,4,5-triacetoxy-6-(acetoxymethyl)tetrahydro-2Hpyran-2-yl)oxy)tetrahydro-2H-pyran-2-yl)oxy)tetrahydro-2H-pyran-2,3,4-triyl triacetate (****5****)*

Ac2O (5 mL) was added to a stirred solution of maltotriose (**4**) (257 mg, 0.51 mmol) in pyridine (10 mL). The reaction mixture was stirred at room temperature for 18 hours under nitrogen and then concentrated *in vacuo*. The residue was dissolved in EtOAc (100 mL) and washed with aqueous Na2CO3 (1 M, 30 mL × 3), aqueous HCl (0.1 M, 30 mL), and brine (30 mL × 2). The organic layer was dried over Na2SO4, filtered and evaporated to dryness *in vacuo*. The residue was purified by flash column chromatography on silica gel to afford 5 in 90.5% yield.

Compound **5** (C40H54O27): 1H NMR (400 MHz, chloroform-d) δ 6.24 (d, J = 3.7 Hz, 0.5H), 5.74 (d, J = 8.1 Hz, 0.5H), 5.57-5.43 (m, 1H), 5.41-5.25 (m, 4H), 5.06 (m, J = 9.9, 2.7 Hz, 1H), 5.02-4.91 (m, 1H), 4.85 (dd, J = 10.5, 4.0 Hz, 1H), 4.74 (m, J = 10.3, 4.4 Hz, 1H), 4.50-4.41 (m, 2H), 4.33-3.84 (m, 10H), 2.23 (s, 1H), 2.18-2.13 (m, 6H), 2.09-1.98 (m, 25H).

*Synthesis of (2R,3R,4R,5R)-2-(acetoxymethyl)-6-(((2R,3R,4R,5R)-4,5-diacetoxy-2-(acetoxymethyl)-6-(((2R,3R,4R,5R)-4,5-diacetoxy-2-(acetoxymethyl)-6-(3-azidopropoxy)tetrahydro-2H-pyran-3-yl)oxy)tetrahydro-2H-pyran-3-yl)oxy)tetrahydro-2H-pyran-3,4,5-triyl triacetate (****1****)*

Compound **5** (389 mg, 0.40 mmol) was placed in a round bottom flask and purged with N2 for 10 min. The flask was then placed on dry ice and cooled before 3-azido-1-propanol (112 µL, 1.2 mmol) was added. The mixture was stirred on dry ice and under N2 for 15 min before BF3 (257 µL, 2.0 mmol) was added. The mixture was stirred for another 2 h on dry ice, allowed to warm to room temperature and stirred overnight. The mixture was then quenched by adding TEA (282 µL, 2.0 mmol), and the solvent was removed under vacuum. The precipitate was then dissolved in EtOAc, washed with brine three times and evaporated to dryness *in vacuo*. Notably, the product contained some deacetylated products, which were also previously reported1,and the mixture was used in the following step. Ac2O (5 mL) was added to a stirred solution of the mixture in pyridine (10 mL). The reaction mixture was stirred at room temperature for 18 hours under nitrogen and then concentrated *in vacuo*. The residue was dissolved in EtOAc (100 mL) and washed with aqueous Na2CO3 (1 M, 30 mL × 3), aqueous HCl (0.1 M, 30 mL), and brine (30 mL × 2). The organic layer was dried over Na2SO4, filtered and evaporated to dryness *in vacuo*. Compound **1** was obtained in 70.6% yield as an off-white precipitate.

Compound **1** (C41H57N3O26): 1H NMR (400 MHz, chloroform-d) δ 6.27 (d, J = 3.7 Hz, 1H), 5.53 (dd, J = 10.2, 8.8 Hz, 1H), 5.45 – 5.33 (m, 4H), 5.09 (m, J = 9.9, 2.4 Hz, 2H), 4.98 (dd, J = 10.1, 3.7 Hz, 1H), 4.88 (m, J = 10.6, 4.1, 1.4 Hz, 1H), 4.77 (m, J = 10.3, 6.3, 4.0 Hz, 2H), 4.54 – 4.47 (m, 3H), 4.31 – 3.99 (m, 10H), 3.91 – 3.59 (m, 2H), 3.55 – 3.16 (m, 2H), 2.26 (s, 3H), 2.19 (d, J = 8.6 Hz, 6H), 2.12 – 2.04 (m, 21H), 1.92

**Synthesis of 2 and 3 (Supplementary Fig. 2)**


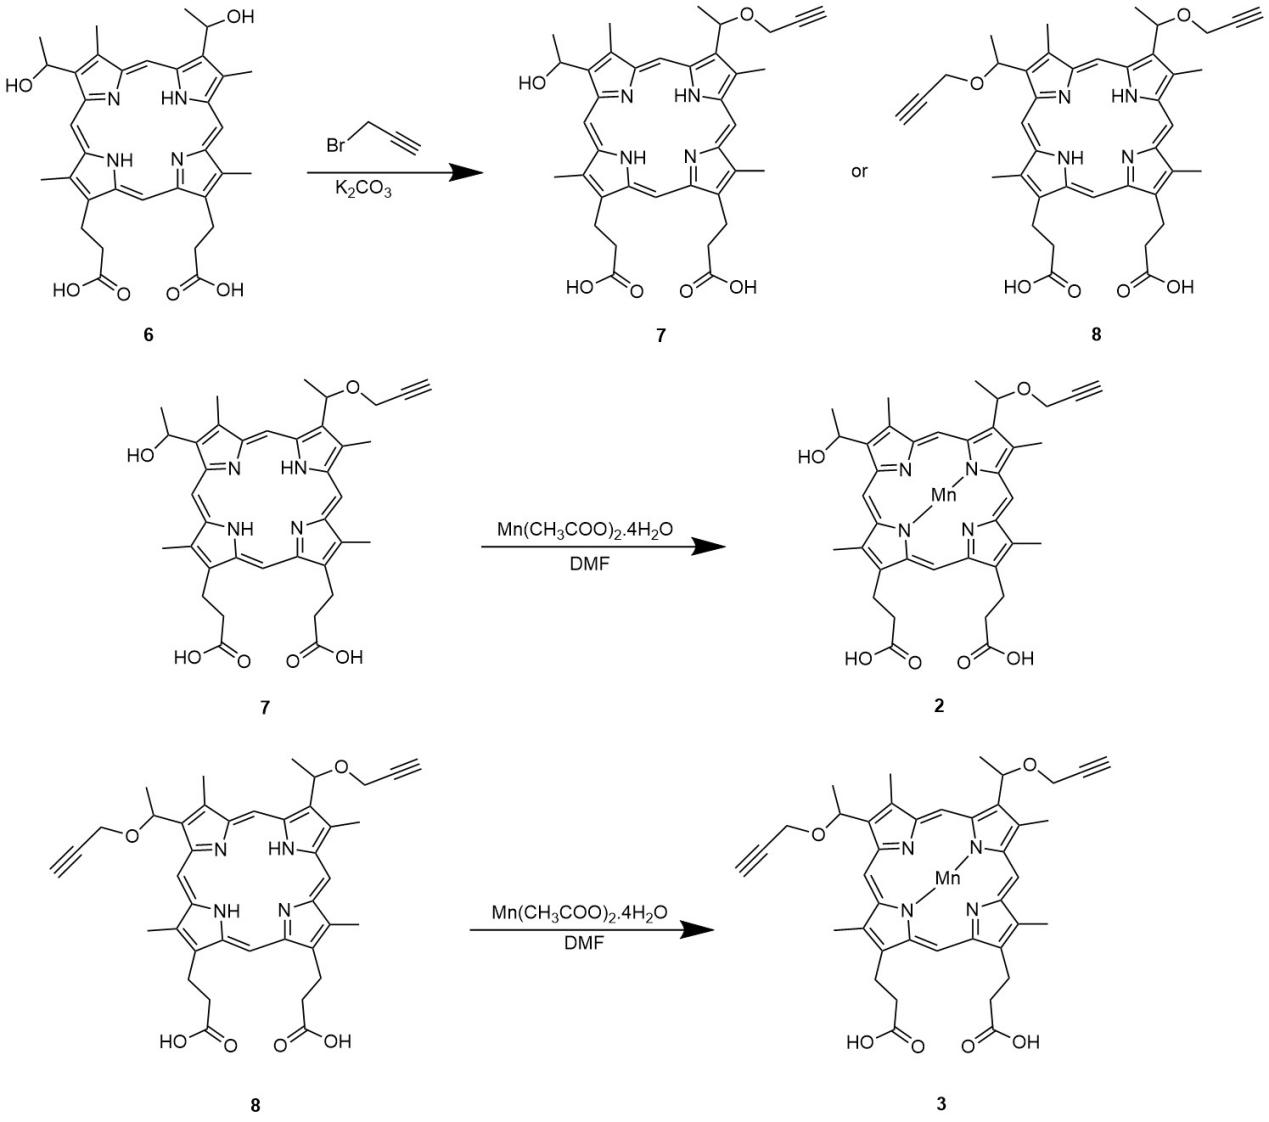


**Supplementary Fig. 2. Synthesis of alkyne-functionalized hematoporphyrins (2) and (3).**

*Synthesis of 3,3'-(7-(1-hydroxyethyl)-3,8,13,17-tetramethyl-12-(1-(prop-2-yn-1-yloxy)ethyl)porphyrin-2,18-diyl)dipropionic acid (****7****) and 3,3'-(3,8,13,17-tetramethyl-7,12-bis(1-(prop-2-yn-1-yloxy)ethyl)porphyrin-2,18-diyl)dipropionic acid (****8****).*

To a stirred solution of Compound **6** (299 mg, 0.5 mmol) in DMF (30 mL) was added propargyl bromide (39 µL, 0.5 mmol) or (117 µL, 1.5 mmol) and K2CO3 (2.28 g, 16.5 mmol). The reaction mixture was heated and kept at 90 °C for 24 h under nitrogen, and the solvent was removed under reduced pressure. The residue was dissolved in CH2Cl2 (50 mL) and washed with water (30 mL × 3) and brine (30 mL × 3). The organic layer was dried over Na2SO4 and purified by flash chromatography. Compounds **7** and **8** were produced in 32.5% and 63.5% yields, respectively.

Compound **7** (C37H40N4O6): 1H NMR (400 MHz, chloroform-d) δ 10.39 (dd, J = 5.6, 1.8 Hz, 2H), 10.02–10.00 (m, 2H), 6.47–6.41 (m, 2H), 4.69 (d, J = 2.4 Hz, 4H), 4.38 (q, J = 3.3 Hz, 4H), 3.60–3.57 (m, 12H), 3.31 (d, J = 7.7 Hz, 4H), 2.33 (q, J = 2.2 Hz, 3H), 2.21–2.18 (m, 6H), -3.91 (s, 2H).

Compound **8** (C40H42N4O6): 1H NMR (400 MHz, chloroform-d) δ 10.72 (dd, J = 21.5, 5.3 Hz, 2H), 10.16 (s, 2H), 6.53 (s, 1H), 6.21 (s, 1H), 4.70 (s, 2H), 4.36 (dd, J = 18.5, 10.0 Hz, 4H), 3.70 (s, 6H), 3.59 (d, J = 22.7 Hz, 6H), 3.34 (s, 4H), 2.47 (s, 1H), 2.16 (d, J = 6.5 Hz, 6H), -4.01 (s, 2H).

*Synthesis of manganese 3,3'-(7-(1-hydroxyethyl)-3,8,13,17-tetramethyl-12-(1-(prop-2-yn-1-yloxy)ethyl)porphyrin-2,18-diyl)dipropionic acid (****2****) and manganese 3,3'-(3,8,13,17-tetramethyl-7,12-bis(1-(prop-2-yn-1-yloxy)ethyl)porphyrin-2,18-diyl)dipropionic acid (****3****).*

Compound **7** (318 mg, 0.5 mmol) or compound **8** (337 mg, 0.5 mmol) was mixed with Mn(CH3COO)2·4H2O in DMF (50 mL) and reacted at 140 °C for 2 h under nitrogen. The residue was dissolved in CH2Cl2 (50 mL) and washed with water (30 mL × 3) and brine (30 mL × 3). The organic phase was dried over Na2SO4, filtered and evaporated to dryness under reduced pressure. The residue was purified by flash column chromatography on silica gel to afford compounds **2** and **3** in 70.3% and 68.5% yields, respectively.

**Synthesis of MT-MnHPs (Supplementary Fig. 3)**


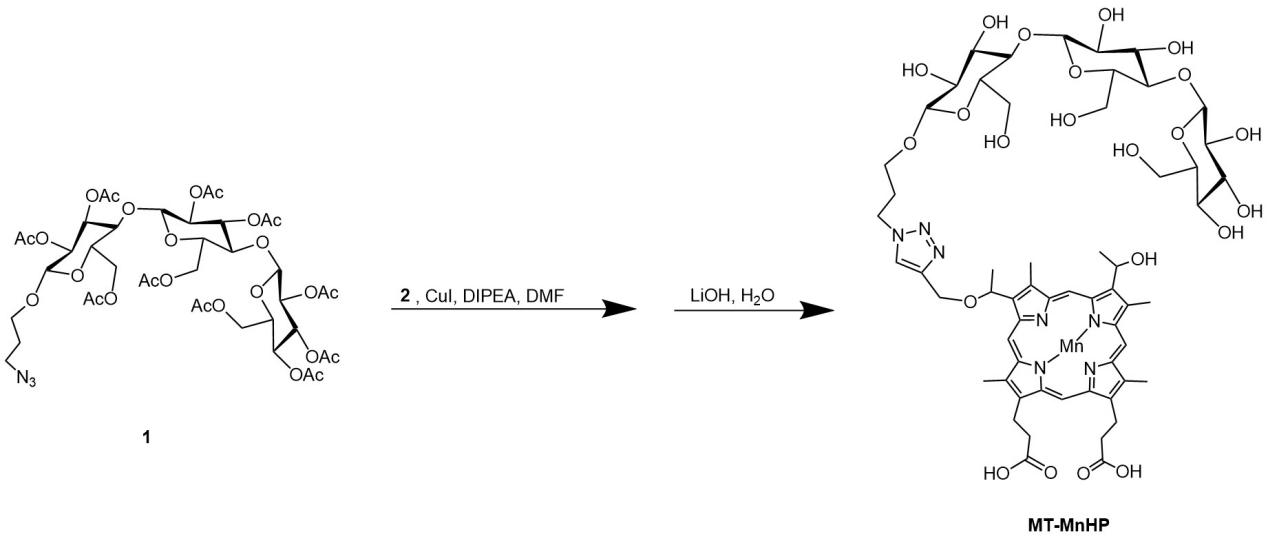


**Supplementary Fig. 3.** **Synthesis of MT-MnHPs.**

*Synthesis of manganese 3,3'-(7-(1-((1-(3-(((2S,3S,5R,6S)-5-(((2R,3S,5R,6S)-3,4-dihydroxy-6-(hydroxymethyl)-5-(((2R,3S,5R,6S)-3,4,5-trihydroxy-6-(hydroxymethyl)tetrahydro-2H-pyran-2-yl)oxy)tetrahydro-2H-pyran-2-yl)oxy)-3,4-dihydroxy-6-(hydroxymethyl)tetrahydro-2H-pyran-2-yl)oxy)propyl)-1H-1,2,3-triazol-4-yl)methoxy)ethyl)-12-(1-hydroxyethyl)-3,8,13,17-tetramethylporphyrin-2,18-diyl)dipropionic acid*

Compound **1** (50 mg, 0.05 mmol) and **2** (69 mg, 0.10 mmol) in DMF (10 mL) was added CuI (0.2 mg, 1.0 µmol) and DIPEA (1.2 mg, 0.01 mmol). The mixture was stirred at room temperature for 12 hours under nitrogen, and the solvent was removed *in vacuo*. The residue was dissolved in CH2Cl2 (30 mL) and washed with brine (10 × 3 mL). Then, aqueous LiOH (1.0 M, 2 mL) was added to the reaction mixture in MeOH (2 mL) under nitrogen, and the reaction mixture was stirred at room temperature for 24 hours. The mixture was then neutralized with Dowex 50 W resin and filtered. The solvent was evaporated under vacuum, and the crude product was dissolved in MeOH and purified by flash column chromatography on silica gel to afford **MT-MnHP** in 62.7% yield. Finally, 10 mg of **MT-MnHP** was dissolved in 1 mL of DMSO and added dropwise to 9 mL of deionized water under sonication with magnetic stirring overnight. **MT-MnHPs** were obtained by centrifugation (10,000 rpm, 10 min) and washing with deionized water.

**Synthesis of (MT)2-MnHPs (Supplementary Fig. 4)**


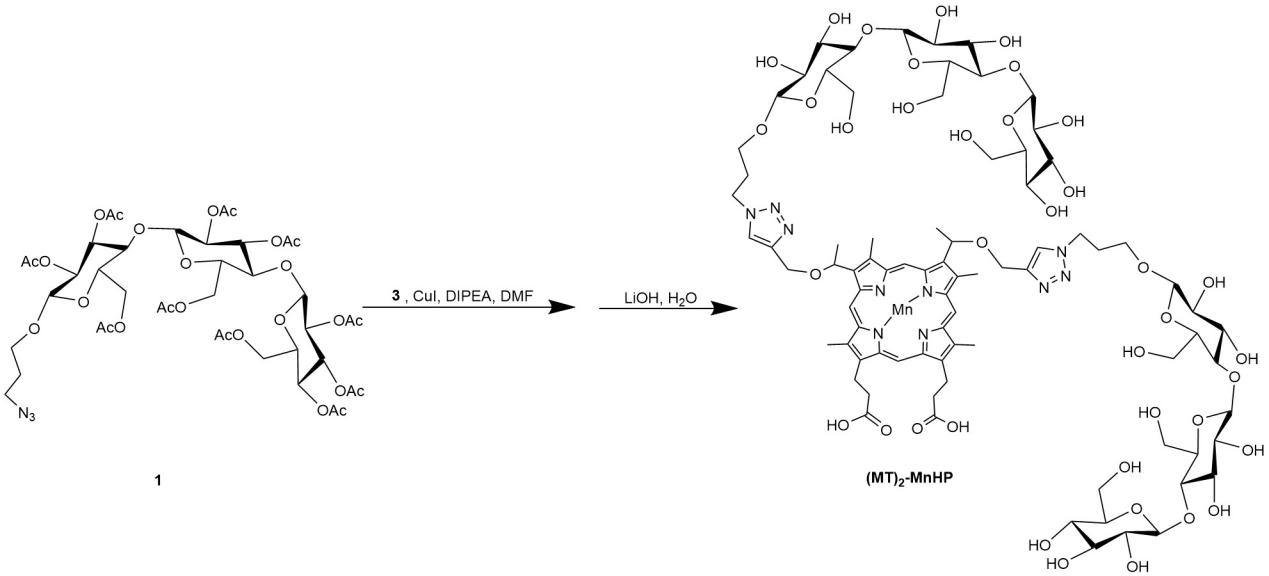


**Supplementary Fig. 4.** **Synthesis of (MT)2-MnHPs.**

*Synthesis of the manganese manganese 3,3'-(7-(1-((1-(3-(((2S,3S,5R,6S)-5-(((2R,3S,5R,6S)-3,4-dihydroxy-6-(hydroxymethyl)-5-(((2R,3S,5R,6S)-3,4,5-trihydroxy-6-(hydroxymethyl)tetrahydro-2H-pyran-2-yl)oxy)tetrahydro-2H-pyran-2-yl)oxy)-3,4-dihydroxy-6-(hydroxymethyl)tetrahydro-2H-pyran-2-yl)oxy)propyl)-1H-1,2,3-triazol-4-yl)methoxy)-12-(1-((1-(3-(((2S,3S,4S,5R,6S)-5-(((2S,3R,5S,6R)-4,4-dihydroxy-6-(hydroxymethyl)-5-(((2S,3R,5S,6R)-3,4,5-trihydroxy-6-(hydroxymethyl)tetrahydro-2H-pyran-2-yl)oxy)tetrahydro-2*

Compound **1** (50 mg, 0.05 mmol) and **3** (72 mg, 0.10 mmol) in DMF (10 mL) was added CuI (0.2 mg, 1.0 µmol) and DIPEA (1.2 mg, 0.01 mmol). The mixture was stirred at room temperature for 12 hours under nitrogen, and the solvent was removed *in vacuo*. The residue was dissolved in CH2Cl2 (30 mL) and washed with brine (10 × 3 mL). Then, aqueous LiOH (1.0 M, 2 mL) was added to the reaction mixture in CH3OH (2 mL) under nitrogen, and the reaction mixture was stirred at room temperature for 24 hours. The mixture was then neutralized with Dowex 50 W resin and filtered. The solvent was evaporated under vacuum, and the crude product was dissolved in MeOH and purified by flash column chromatography on silica gel to afford **(MT)2-MnHP** in 60.3% yield. Finally, 10 mg of **(MT)2-MnHP** was dissolved in 1 mL of DMSO and added dropwise to 9 mL of deionized water under sonication with magnetic stirring overnight. **(MT)2-MnHPs** were obtained by centrifugation (10000 rpm, 10 min) and washing with deionized water.


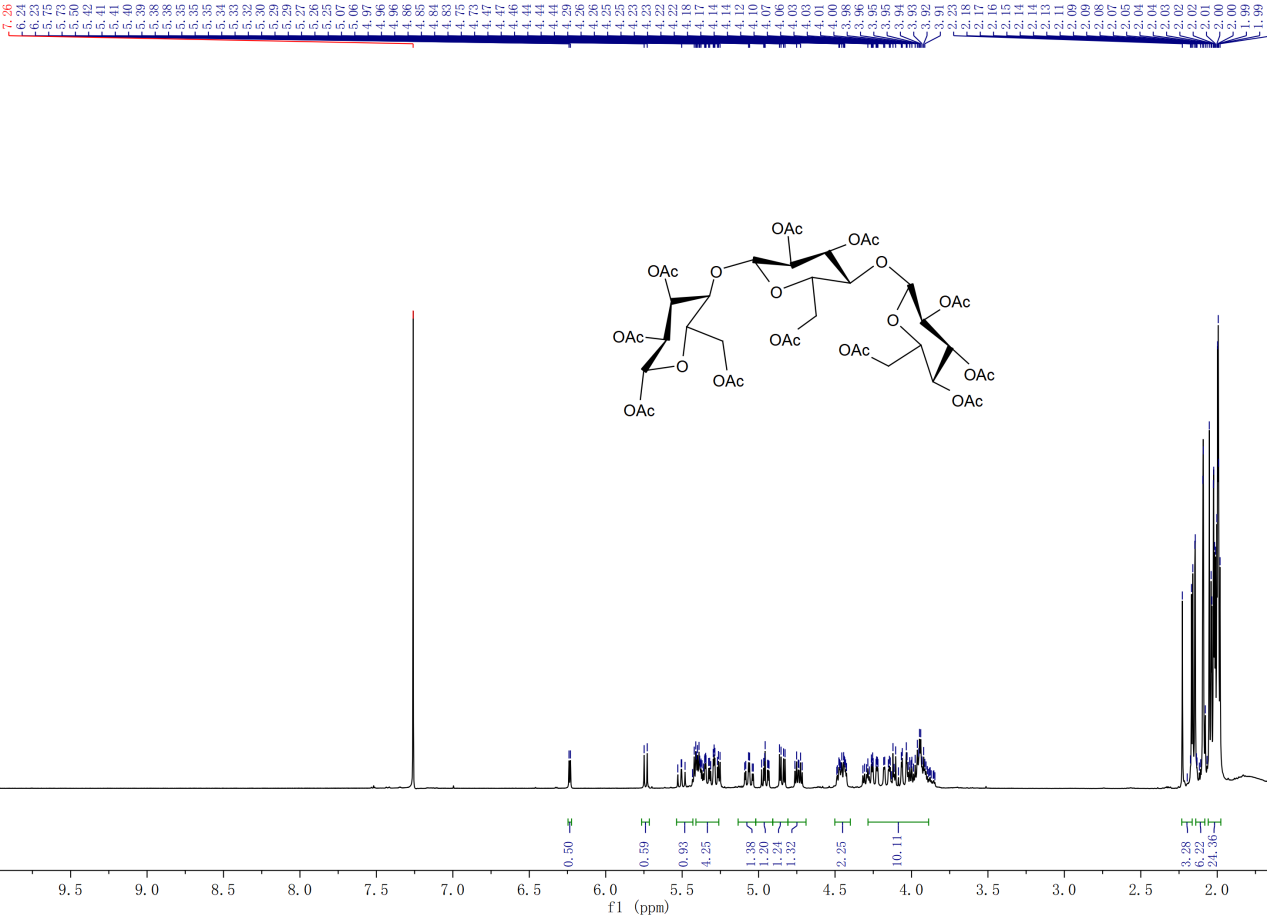

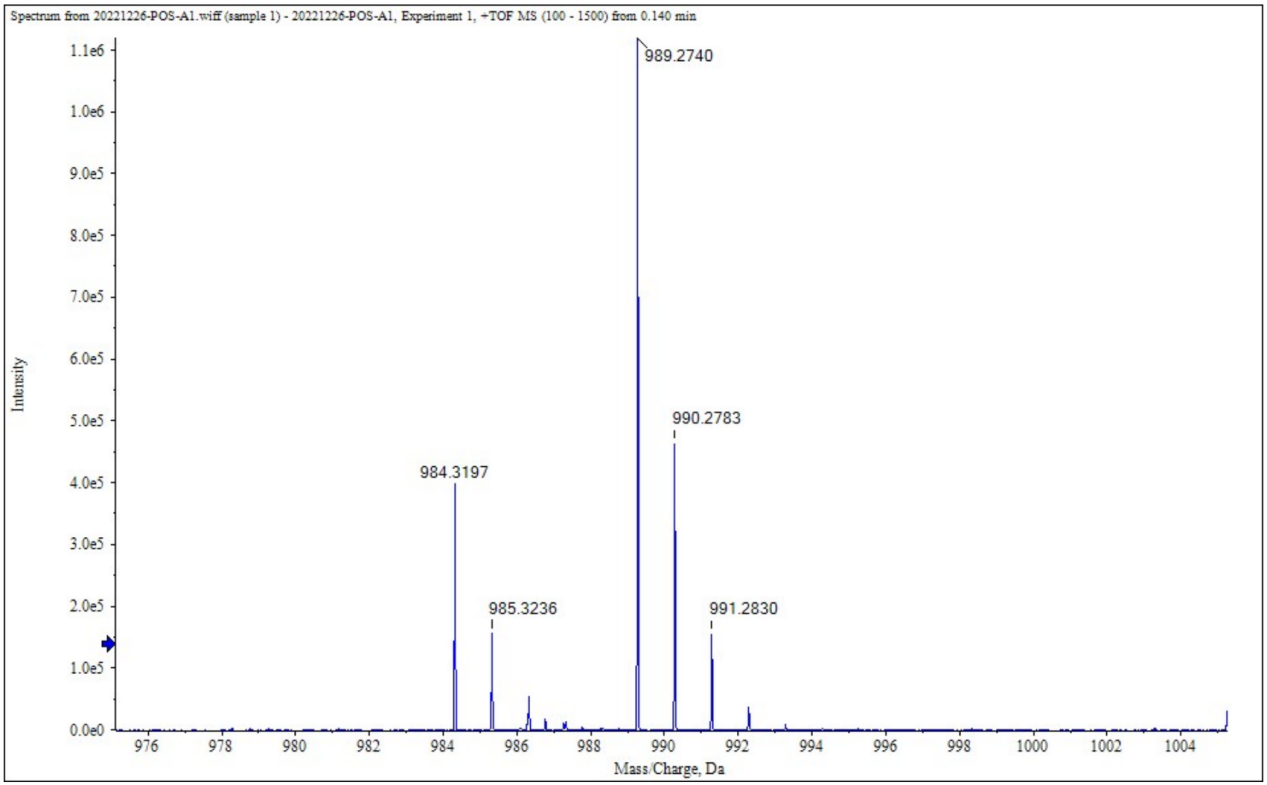


**Supplementary Fig. 5. 1H NMR spectrum (400 MHz, chloroform-d6) and HRMS spectrum of compound 5.**


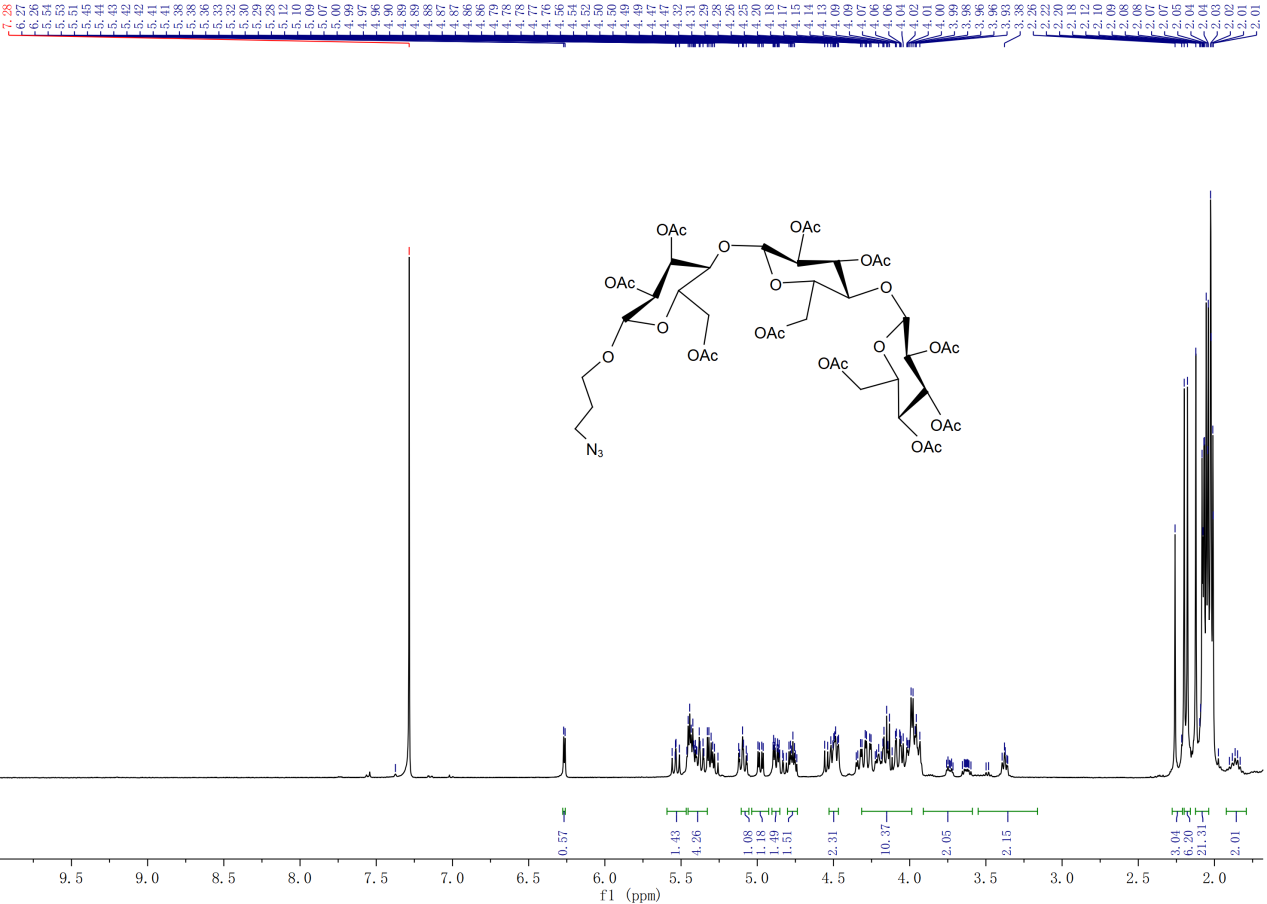


**Supplementary Fig. 6. 1H NMR spectrum (400 MHz, Chloroform-d6) of compound 1.**


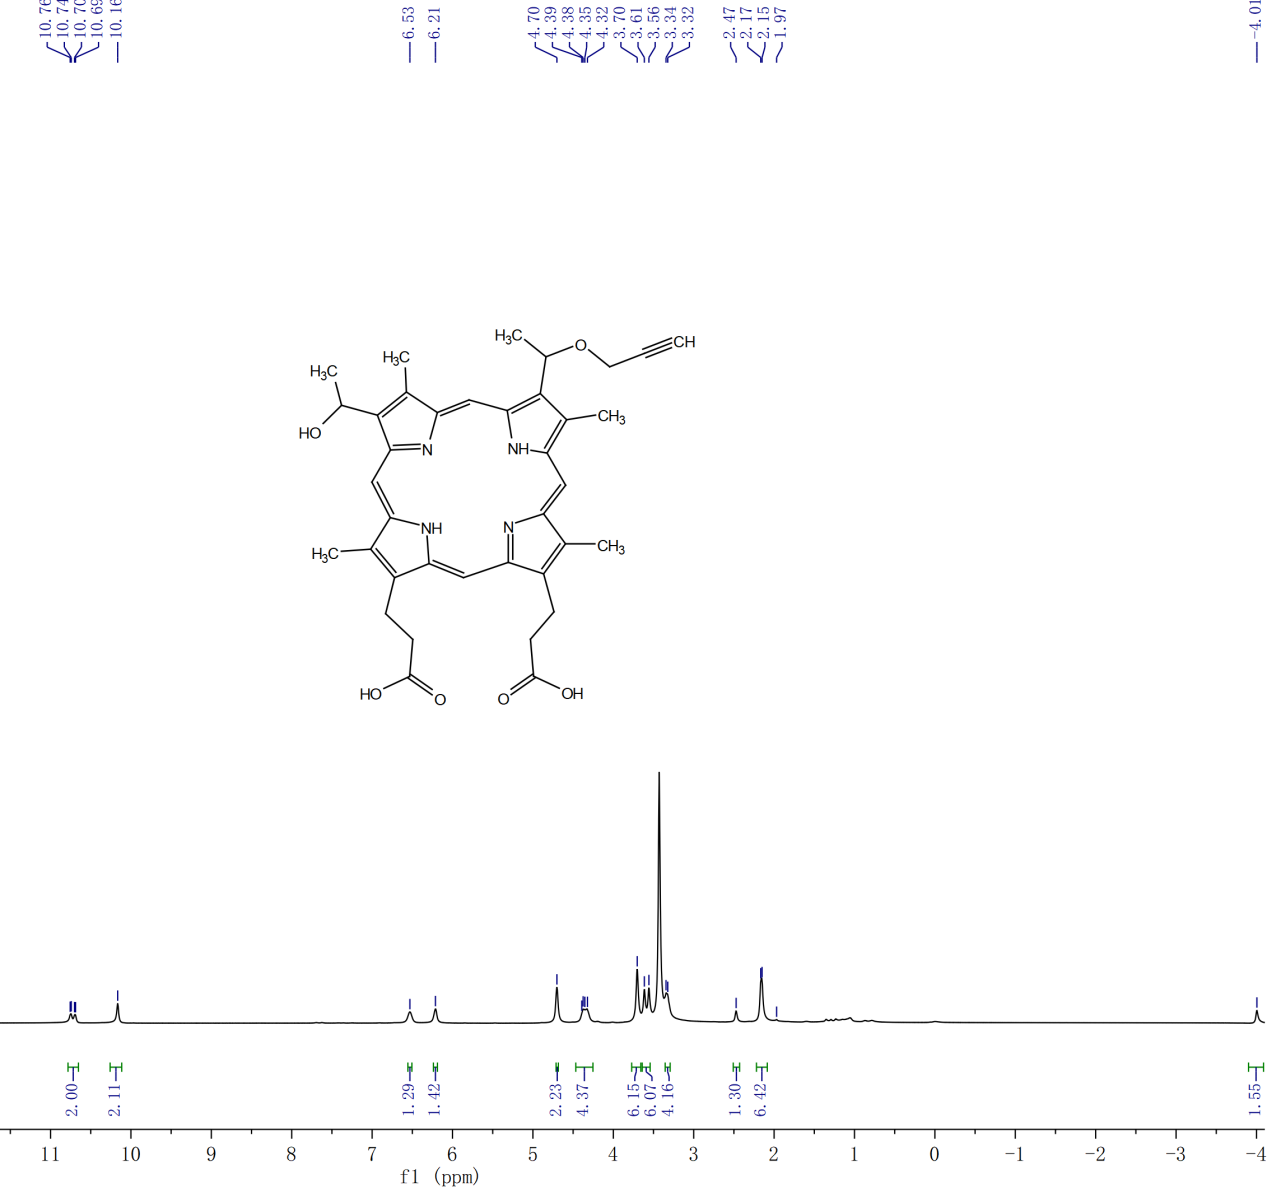


**Supplementary Fig. 7. 1H NMR spectrum (400 MHz, Chloroform-d6) of compound 7**.


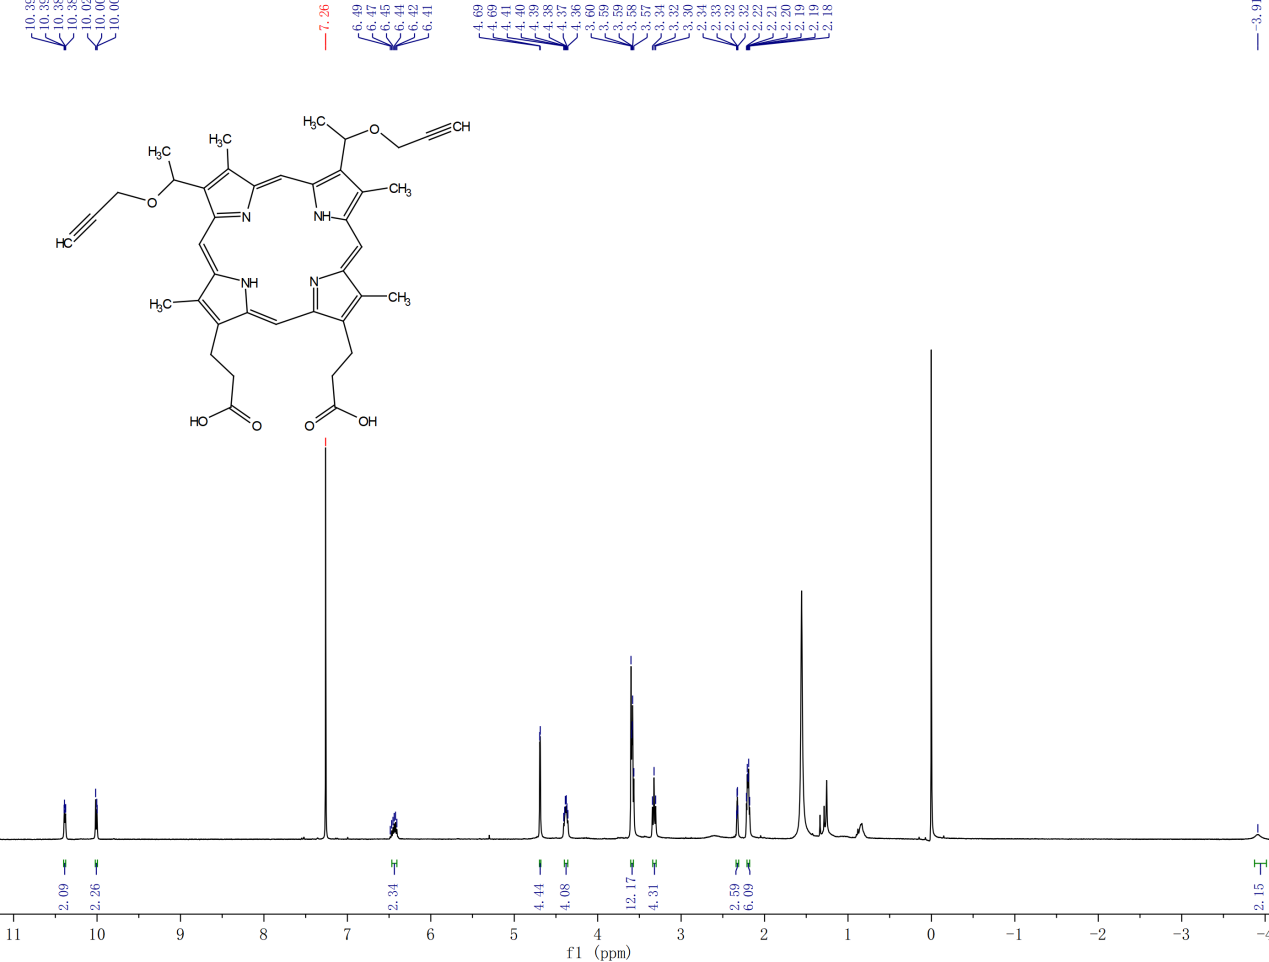


**Supplementary Fig. 8. 1H NMR spectrum (400 MHz, Chloroform-d6) of compound 8.**


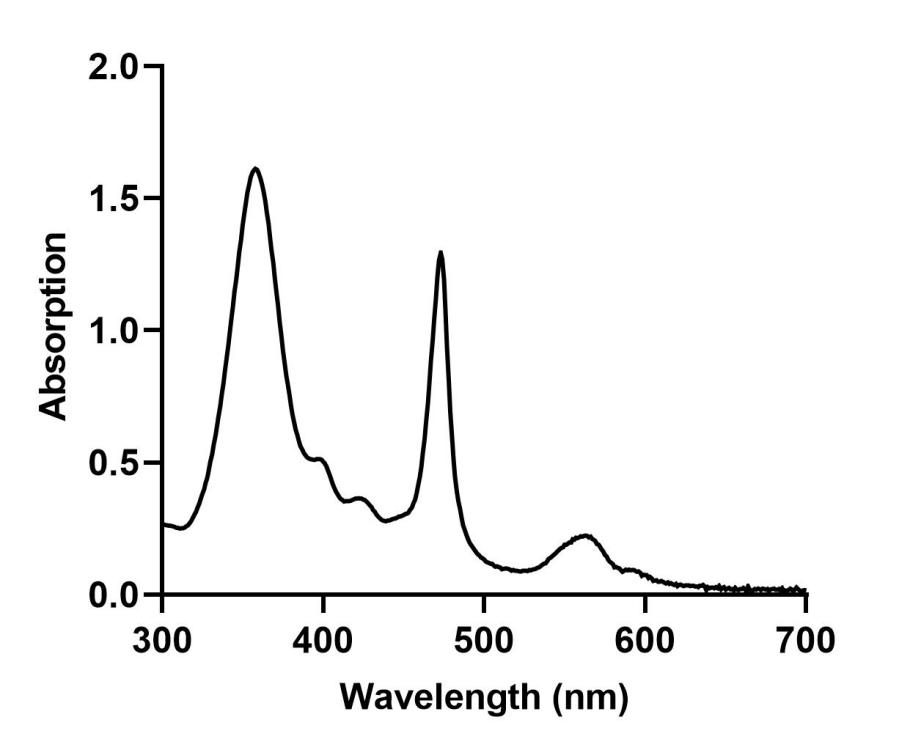


**Supplementary Fig. 9. UV‒vis absorption spectra of compound 2.**

**
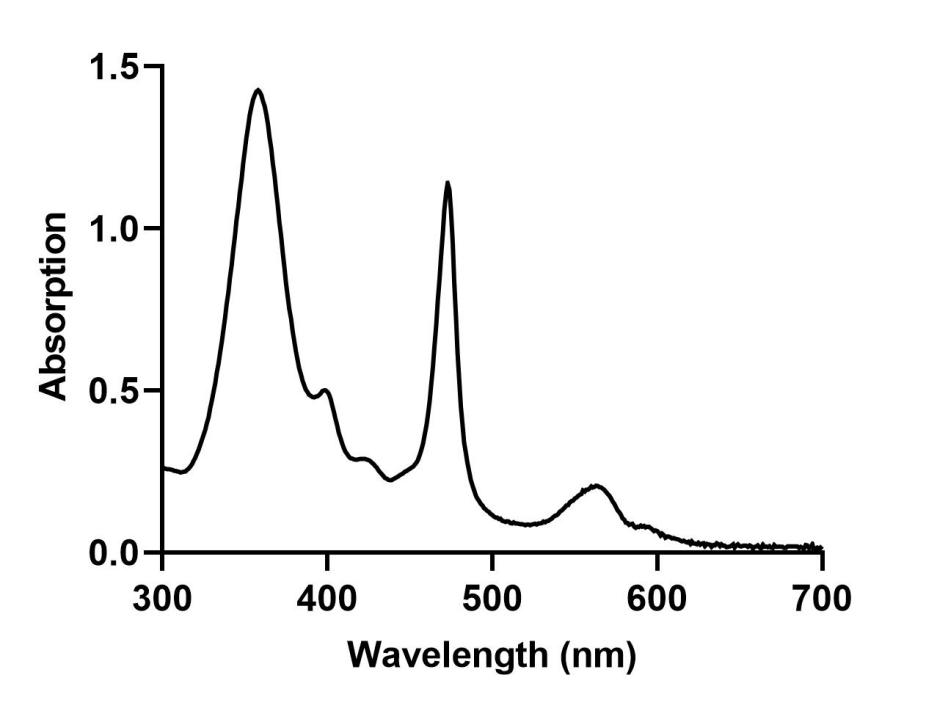
**

**Supplementary Fig. 10. UV‒vis absorption spectra of compound 3.**

**
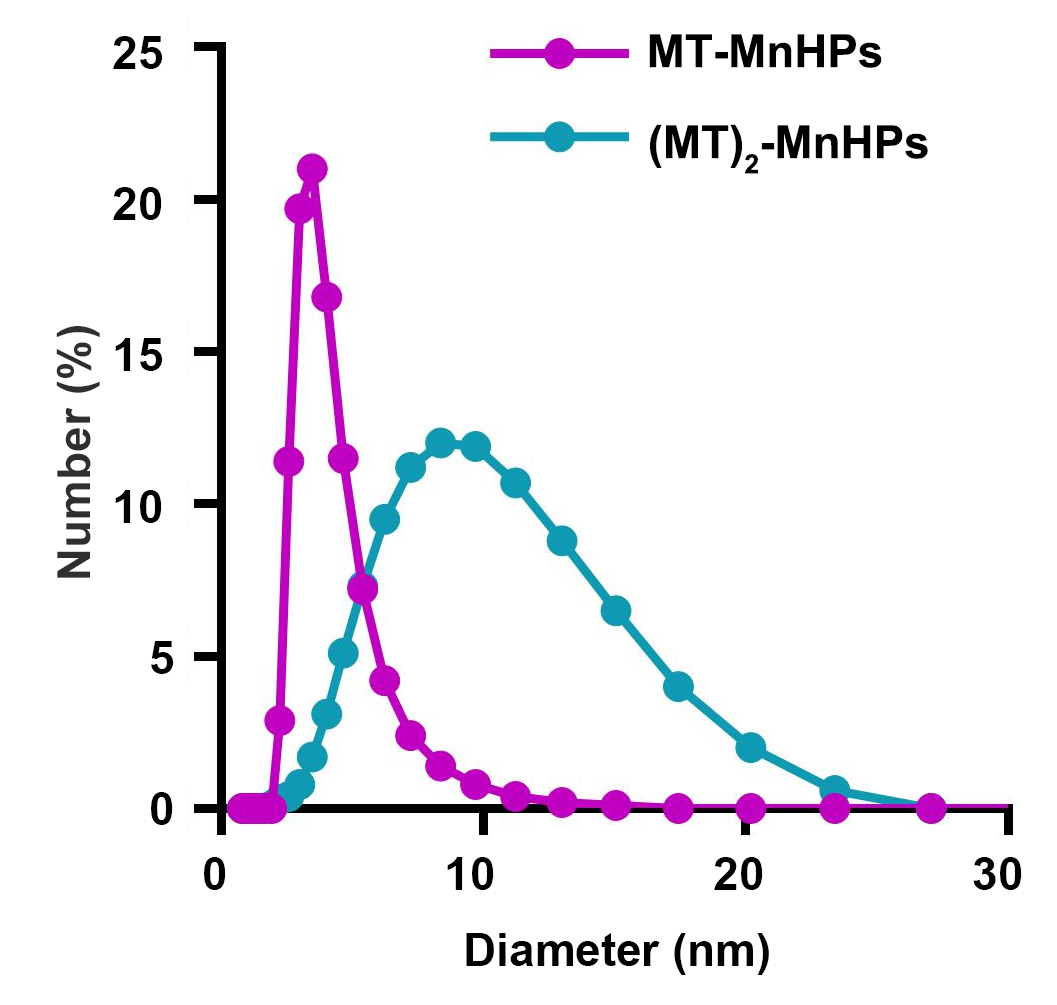
**

**Supplementary Fig. 11.** **DLS analysis of MT-MnHPs and (MT)2-MnHPs.**


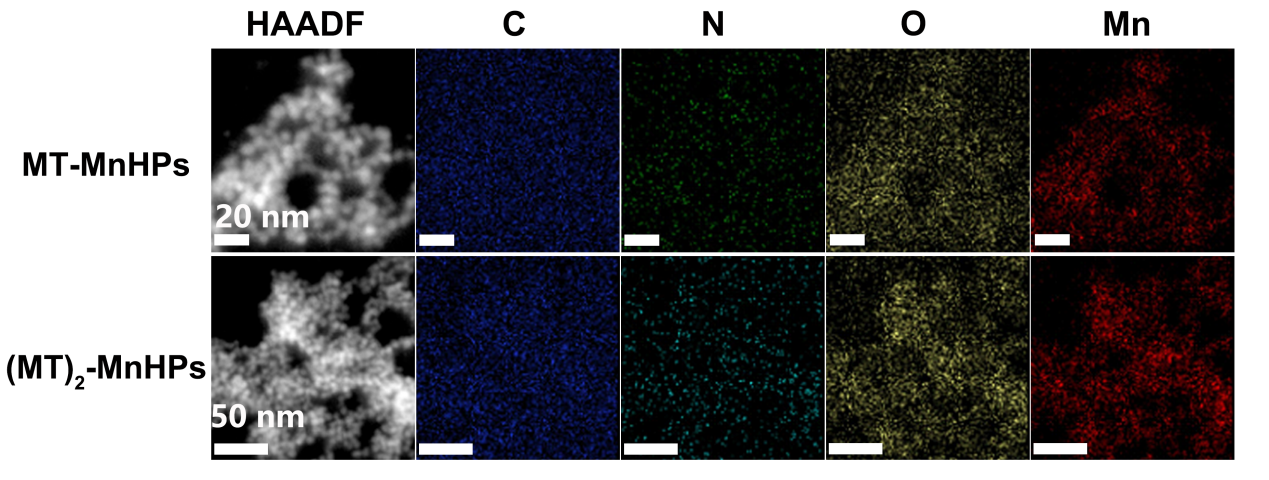


**Supplementary Fig. 12. High-angle annular dark field-scanning TEM (HAADF-STEM) images of MT-MnHPs and (MT)2-MnHPs.** Scale bars, 20 nm or 50 nm. All imaging experiments were repeated three times with similar results.

**
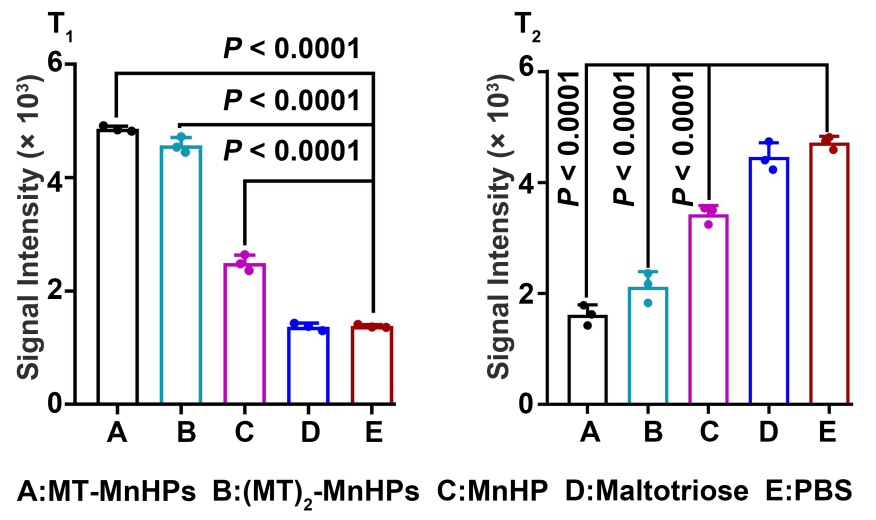
**

**Supplementary Fig. 13. The resulting T1 and T2 signal intensities of MRSA after different treatments as indicated.** Statistical analysis was performed via one-way ANOVA. The data are presented as the means ± SDs (n = 3).

**
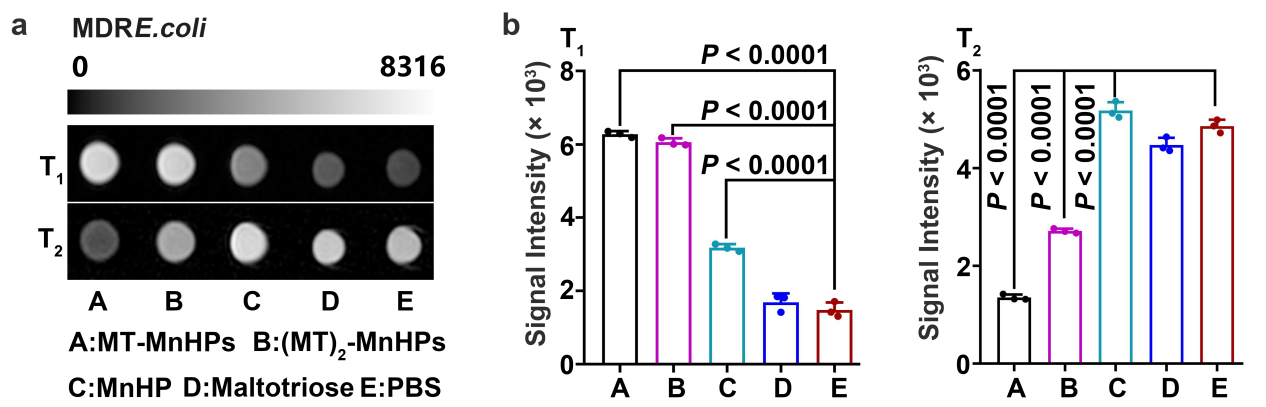
**

**Supplementary Fig. 14. MRI images of MDR *E. coli* treated with Trojan MRI probes.** **a**,T1- and T2-weighted MR images of MDR *E. coli* treated with PBS (control), 0.3 mM MT-MnHPs, (MT)2-MnHPs, MnHP, maltotriose or PBS at 37 °C for 2 h. **b**, The resulting T1 and T2 signal intensities of MDR *E. coli* subjected to different treatments as indicated. After incubation, the treated bacteria were rinsed with PBS several times, followed by imaging (a 3.0 T human MRI scanner was used). All imaging experiments were repeated three times with similar results. Statistical analysis was performed via one-way ANOVA. The data are presented as the means ± SDs (n = 3).


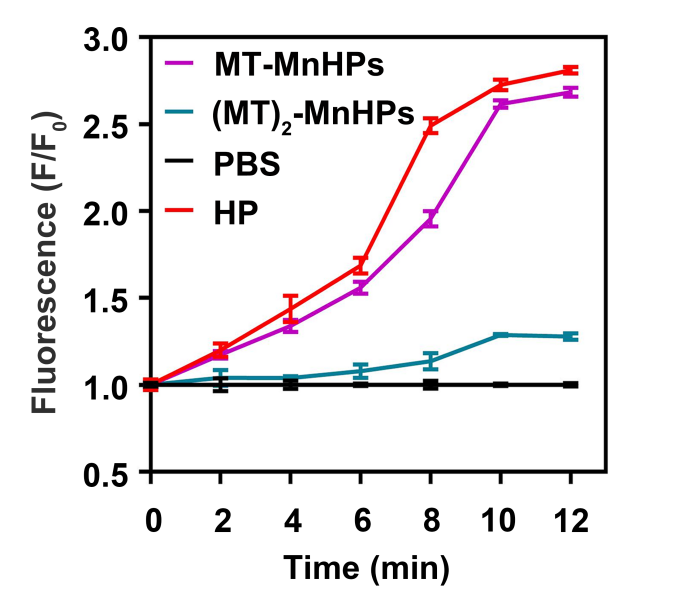


**Supplementary Fig. 15.** **Changes in the relative fluorescence intensity at 504 nm for SOSG in the presence of PBS, HP, MT-MnHPs, or (MT)2-MnHPs under US.** The data are presented as the means ± SDs (n = 3).


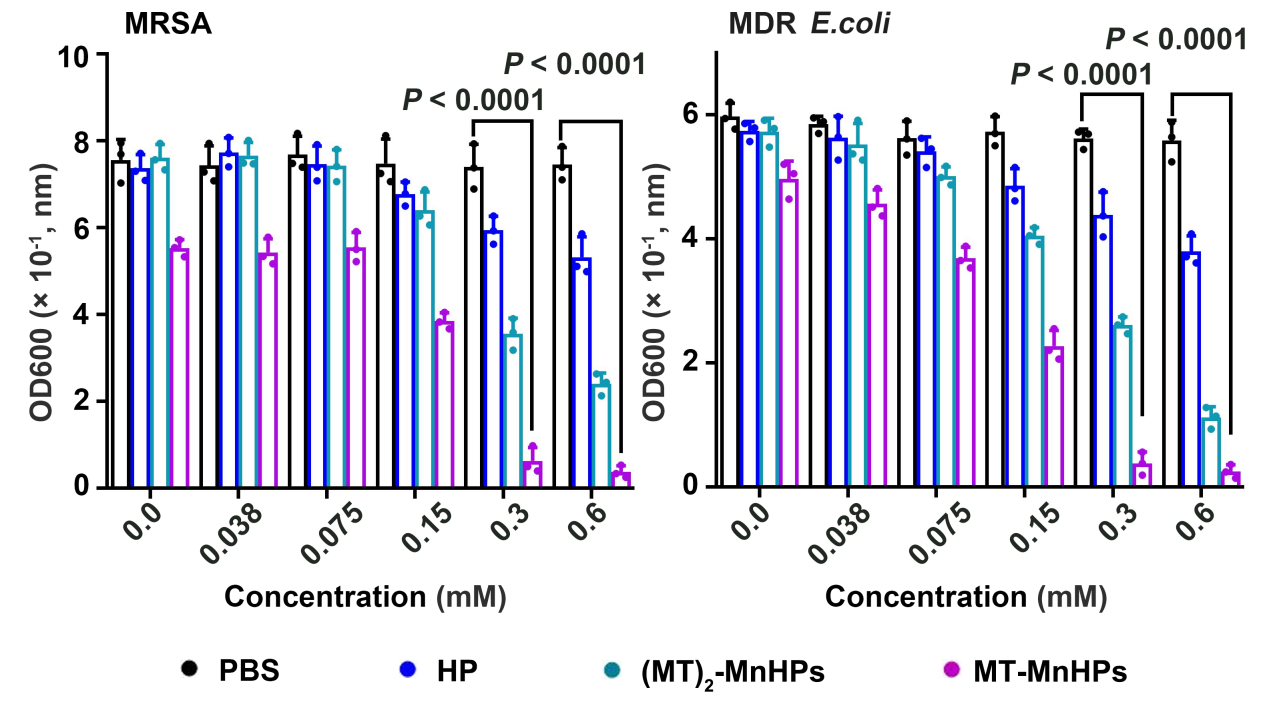


**Supplementary Fig. 16. Viability of MRSA and MDR *E. coli* following US exposure for 10 min at various MT-MnHP concentrations.** Statistical analysis was performed via paired two-tailed t tests. The data are presented as the means ± SDs (n = 3).


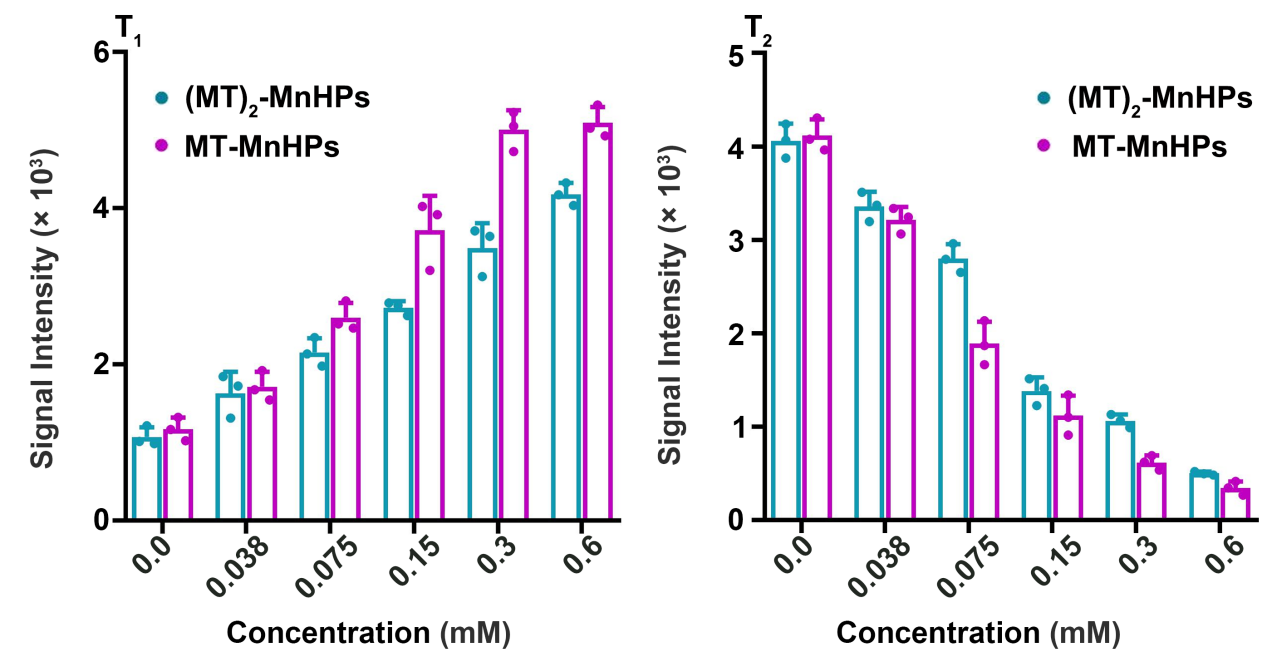


**Supplementary Fig. 17. Corresponding T1 and T2 signal intensities for MT-MnHPs and (MT)2-MnHPs.** The data are presented as the means ± SDs (n = 3).

**
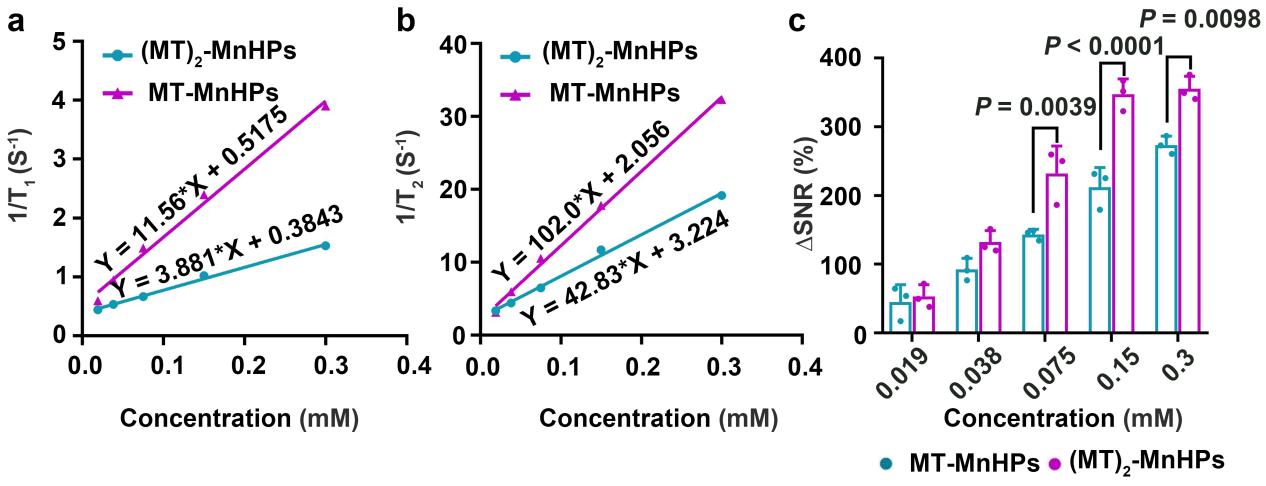
**

**Supplementary Fig. 18. Magnetic resonance imaging properties of bacteria-targeting MR probes. a**, Relaxation rates (1/T1, s−1) of MT-MnHPs and (MT)2-MnHPs. **b**, Relaxation rates (1/T2, s−1) of MT-MnHPs and (MT)2-MnHPs. **c**, ΔSNR from the MR signals of MT-MnHPs and (MT)2-MnHPs. Statistical analysis was performed via paired two-tailed t tests. The data are presented as the means ± SDs (n = 3).


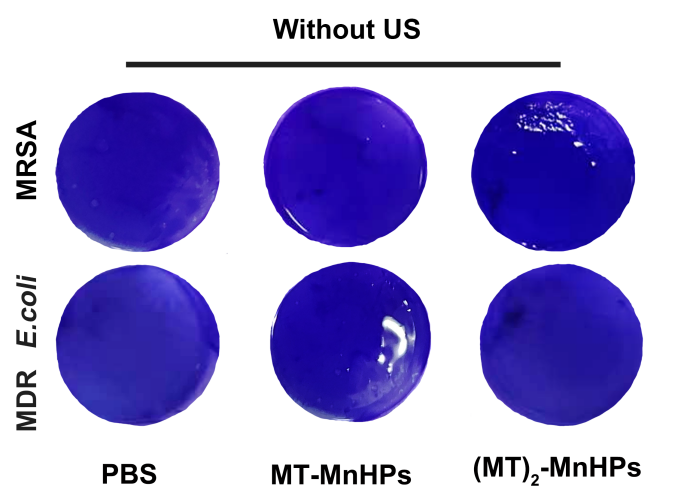


**Supplementary Fig. 19. Photographs of MRSA and MDR *E. coli* biofilms stained with crystal violet after various treatments.** All imaging experiments were repeated three times with similar results.

**
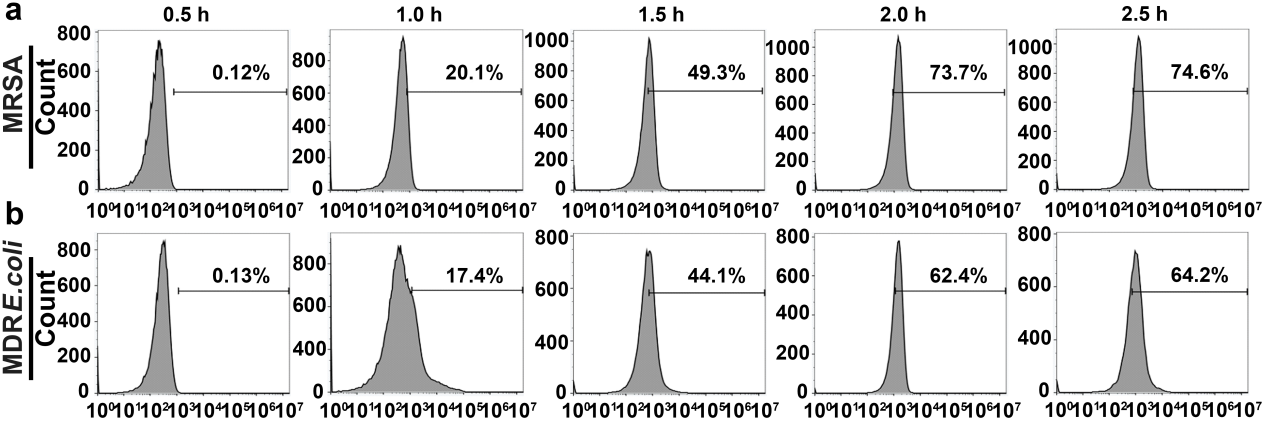
**

**Supplementary Fig. 20. The effects of incubation time on the uptake of MT-MnHPs by bacteria.** **a**, Flow cytometry analysis of MRSA coincubated with MT-MnHPs at a maltotriose concentration (0.3 mM) at 37 °C for 0.5 h, 1.0 h, 1.5 h, 2.0 h or 2.5 h. **b**, Flow cytometry analysis of MDR *E. coli* coincubated with MT-MnHPs at a maltotriose concentration (0.3 mM) at 37 °C for 0.5 h, 1.0 h, 1.5 h, 2.0 h or 2.5 h**.**

**
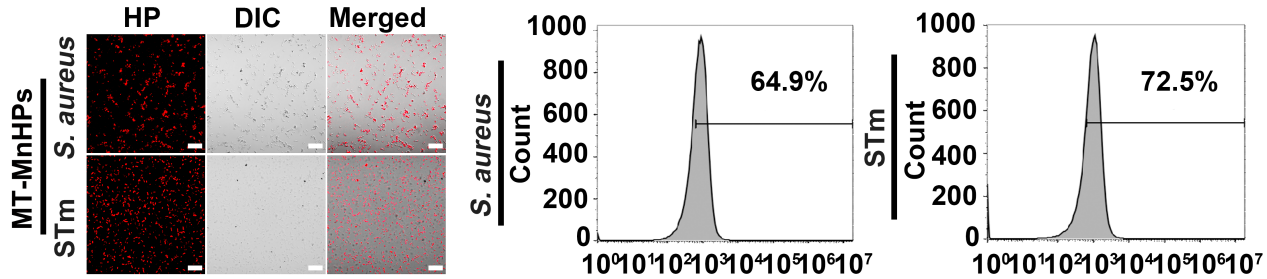
**

**Supplementary Fig. 21. Confocal images of *S. aureus* or *Salmonella typhimurium* (STm) after incubation with MT-MnHPs (0.3 mM) and corresponding flow cytometry analysis of uptake rates.** After incubation, the treated bacteria were rinsed with PBS several times. The bacterial cell concentration was ~108 CFU. Scale bar, 25 μm. All imaging experiments were repeated three times with similar results.


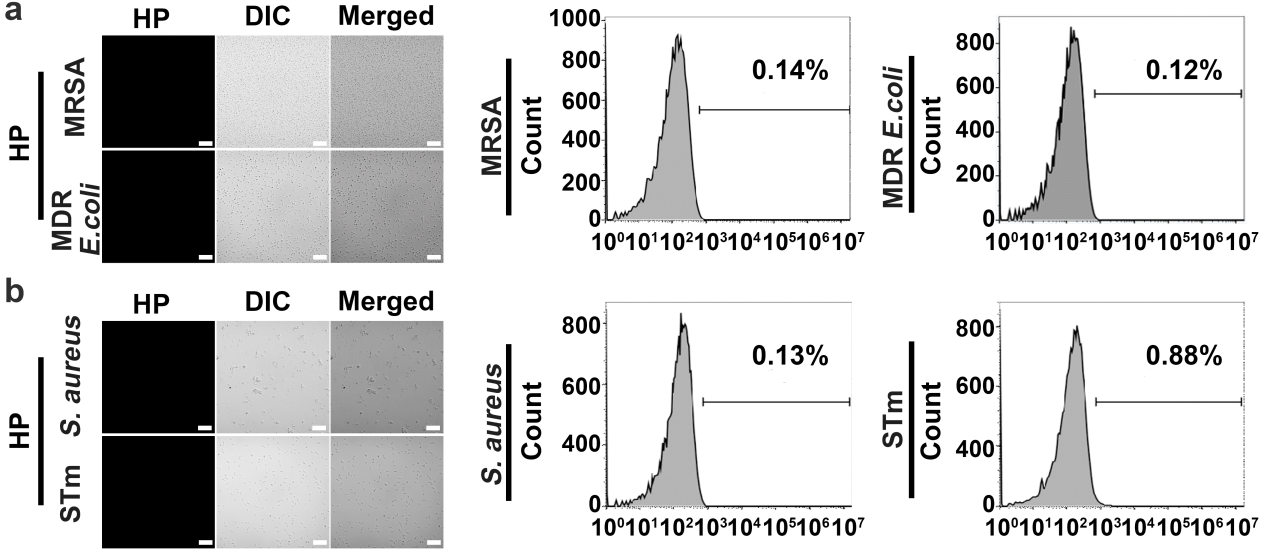


**Supplementary Fig. 22. CLSM images of bacteria treated with HP. a**,Confocal images of MRSA or MDR *E. coli* after incubation with 0.3 mM HP and corresponding flow cytometry analysis of uptake rates. **b**,Confocal images of *S. aureus* or *Salmonella typhimurium* (STm) after incubation with 0.3 mM HP and corresponding flow cytometry analysis of uptake rates. After incubation, the treated bacteria were rinsed with PBS several times. The bacterial cell concentration was ~108 CFU. Scale bar, 25 μm. All imaging experiments were repeated three times with similar results.


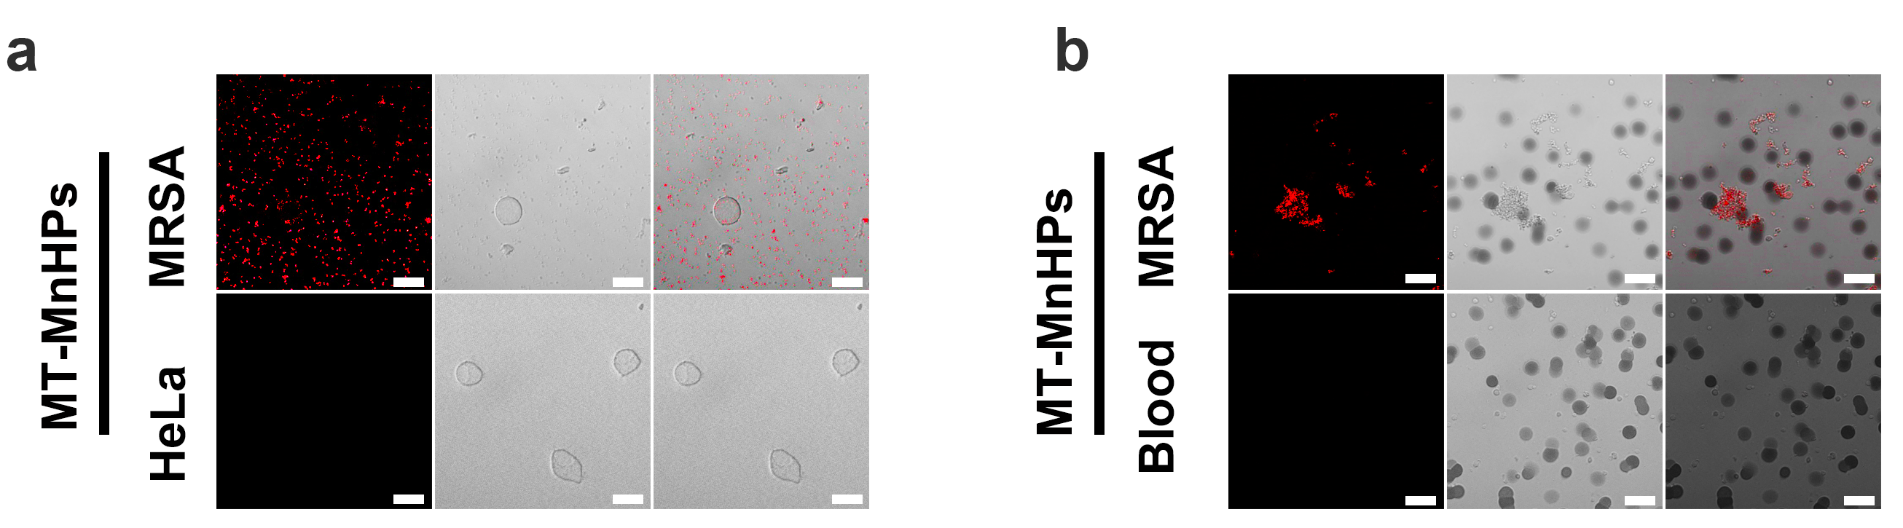


**Supplementary Fig. 23. Evaluation of the selectivity of MT-MnHPs for bacteria over mammalian cells.** Confocal fluorescence images of (**a**) HeLa cells and (**b**) blood cells after coincubation with MT-MnHPs (0.3 mM) for 2 h. After incubation, the treated cells were rinsed with PBS several times. Scale bar, 25 μm. All imaging experiments were repeated three times with similar results.

**
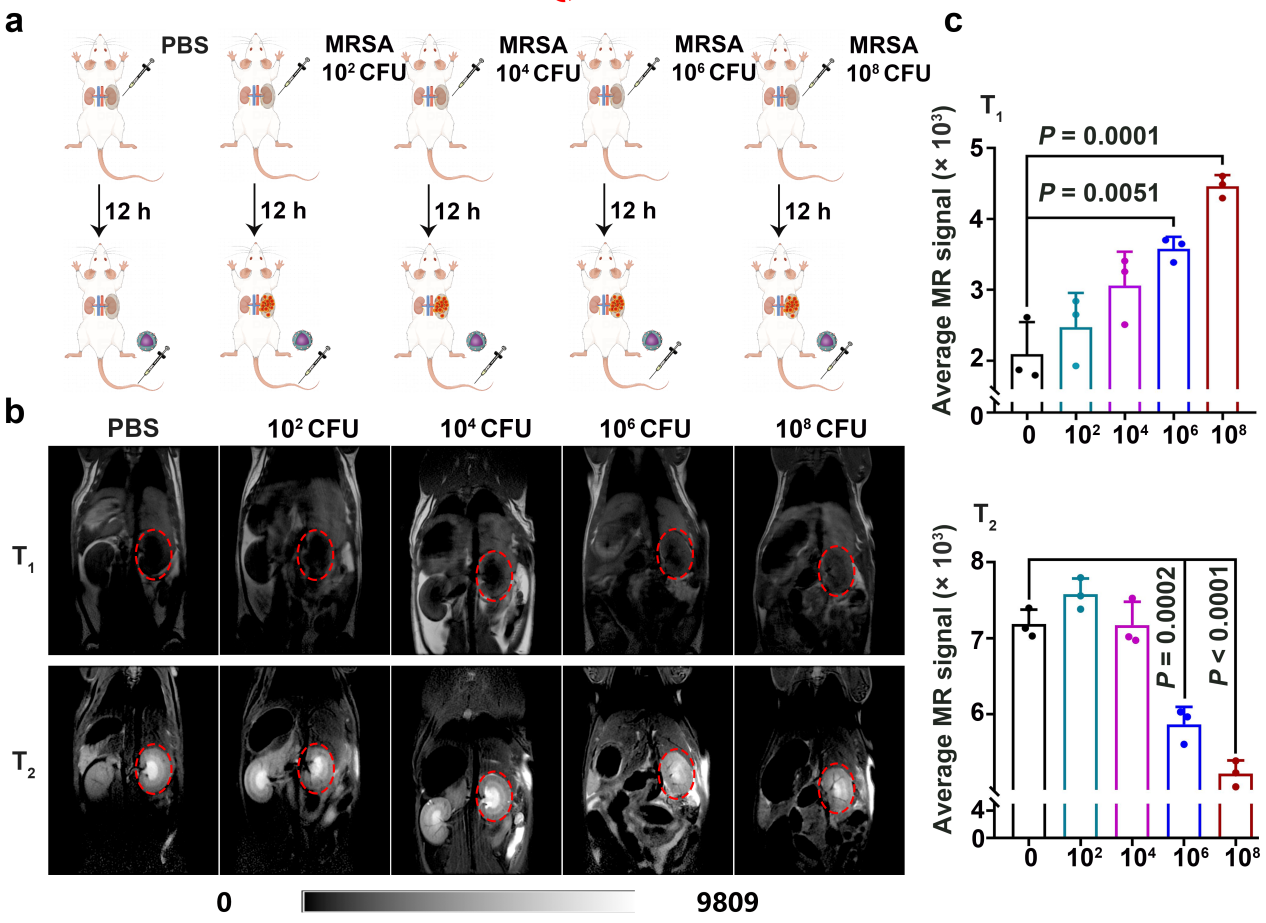
**

**Supplementary Fig. 24. In vivo imaging in mouse models of nephritis based on the proposed Trojan horse strategy. a**, Scheme illustrating the magnetic resonance imaging of MRSA-induced nephritis in mice by using Trojan MRI contrast agents. **b**, Magnetic resonance imaging of MRSA (102~108 CFU)-induced nephritis in mice with MT-MnHPs (0.3 mM, 200 µL) as indicated. **c**, The resulting T1 and T2 signal intensities of MRSA (102~108 CFU)-induced nephritis in mice with MT-MnHPs (0.3 mM, 200 µL) as indicated. All imaging experiments were repeated three times with similar results. Statistical analysis was performed via one-way ANOVA. The data are presented as the means ± SDs (n = 3).


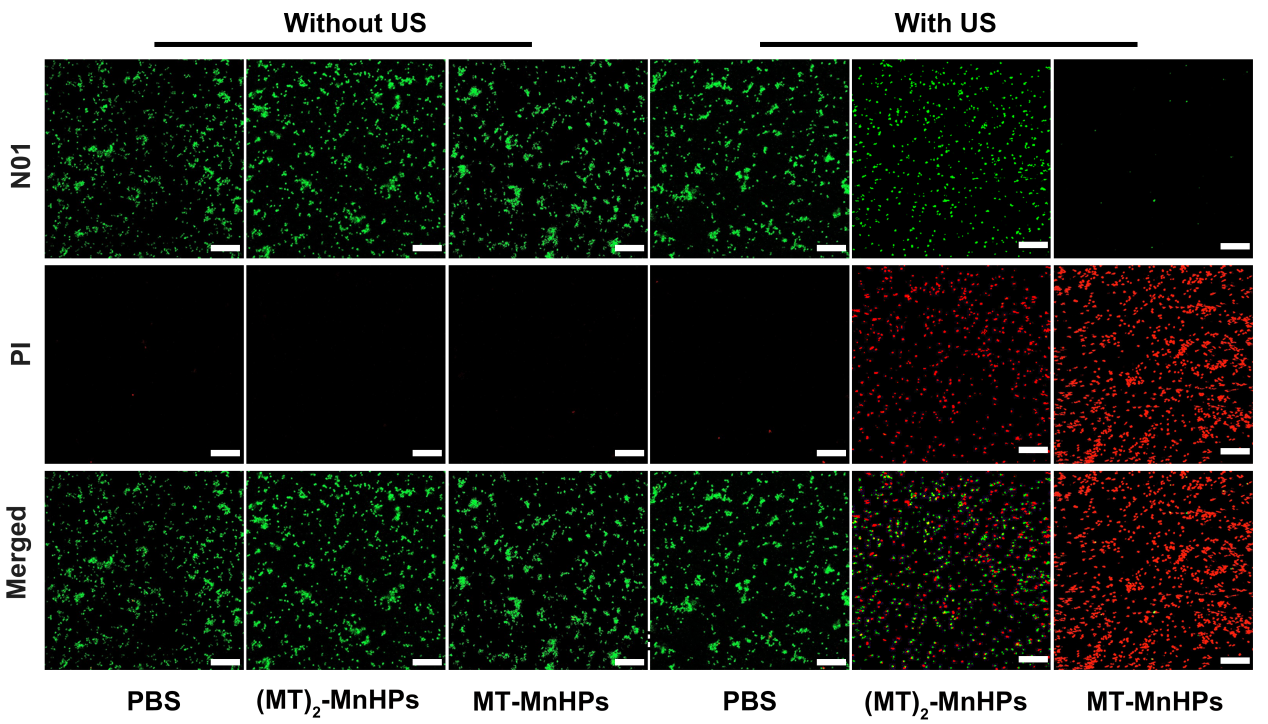


**Supplementary Fig. 25. Confocal fluorescence images from a live/dead bacterial staining assay of MRSA incubated with PBS, MT-MnHPs (0.3 mM), or (MT)2-MnHPs (0.3 mM) with or without ultrasound irradiation.** Scale bar, 25 μm. All imaging experiments were repeated three times with similar results.

**
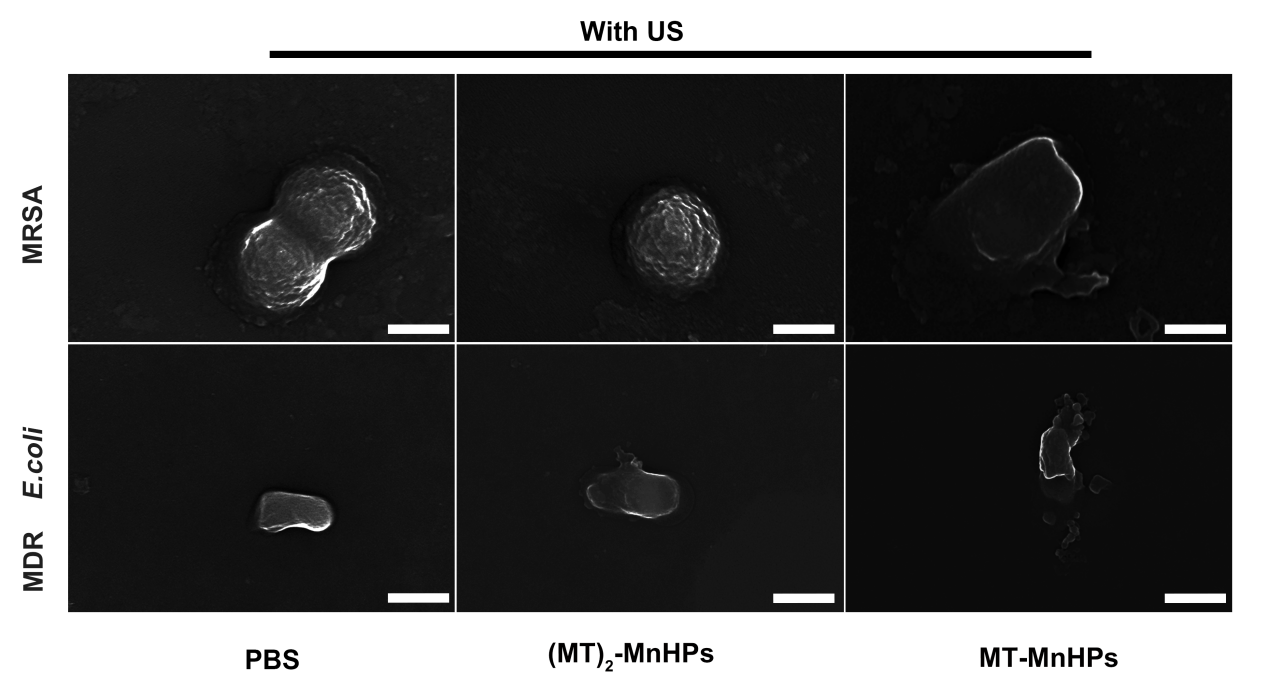
**

**Supplementary Fig. 26. SEM images of MRSA and MDR *E. coli* treated with MT-MnHPs (0.3 mM) under ultrasonic irradiation (1 MHz, 1.5 W cm⁻² for 10 min).** Scale bar, 200 nm. All imaging experiments were repeated three times with similar results.


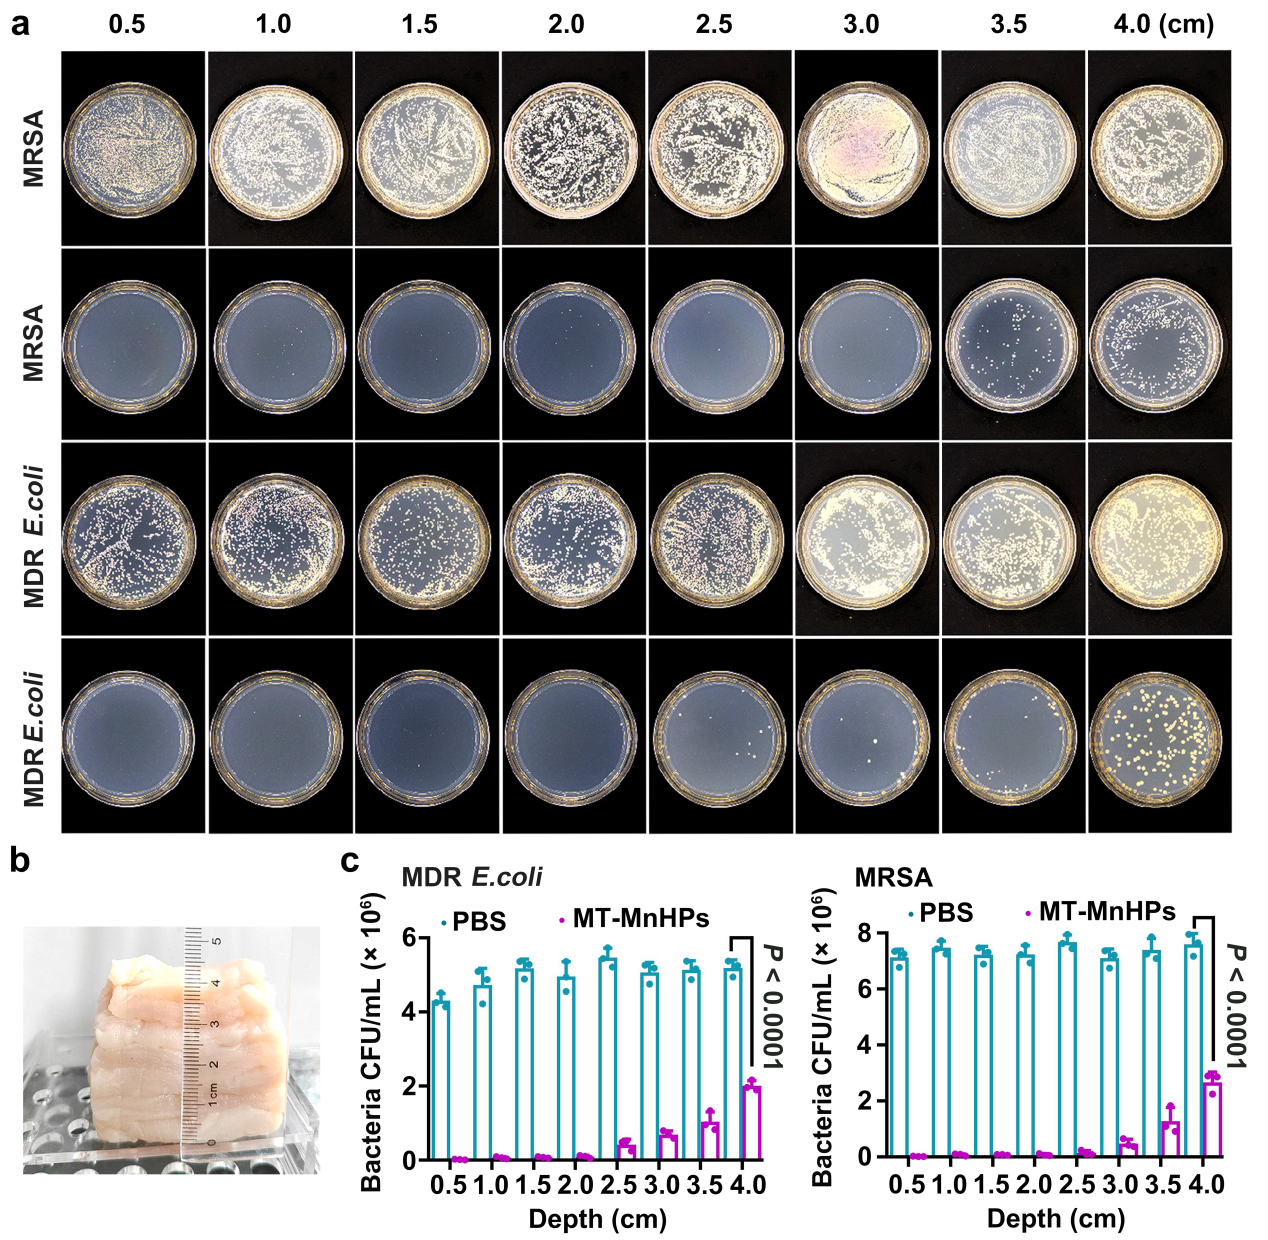


**Supplementary Fig. 27. In vitro antibacterial activity of Trojan MR probes. a**, Photographs of agar plates showing the thickness-dependent antibacterial effect of MT-MnHPs (0.3 mM) on MRSA and MDR *E. coli*. **b**,Actual image of a 4 cm thick chicken breast tissue sample. **c**,Corresponding histograms depicting bacterial counts for MRSA and MDR *E. coli*. All imaging experiments were conducted in triplicate, yielding consistent results. Statistical analyses were performed via paired two-tailed t tests, and the error bars represent the standard deviations from three independent measurements. The data are presented as the means ± SDs (n = 3).


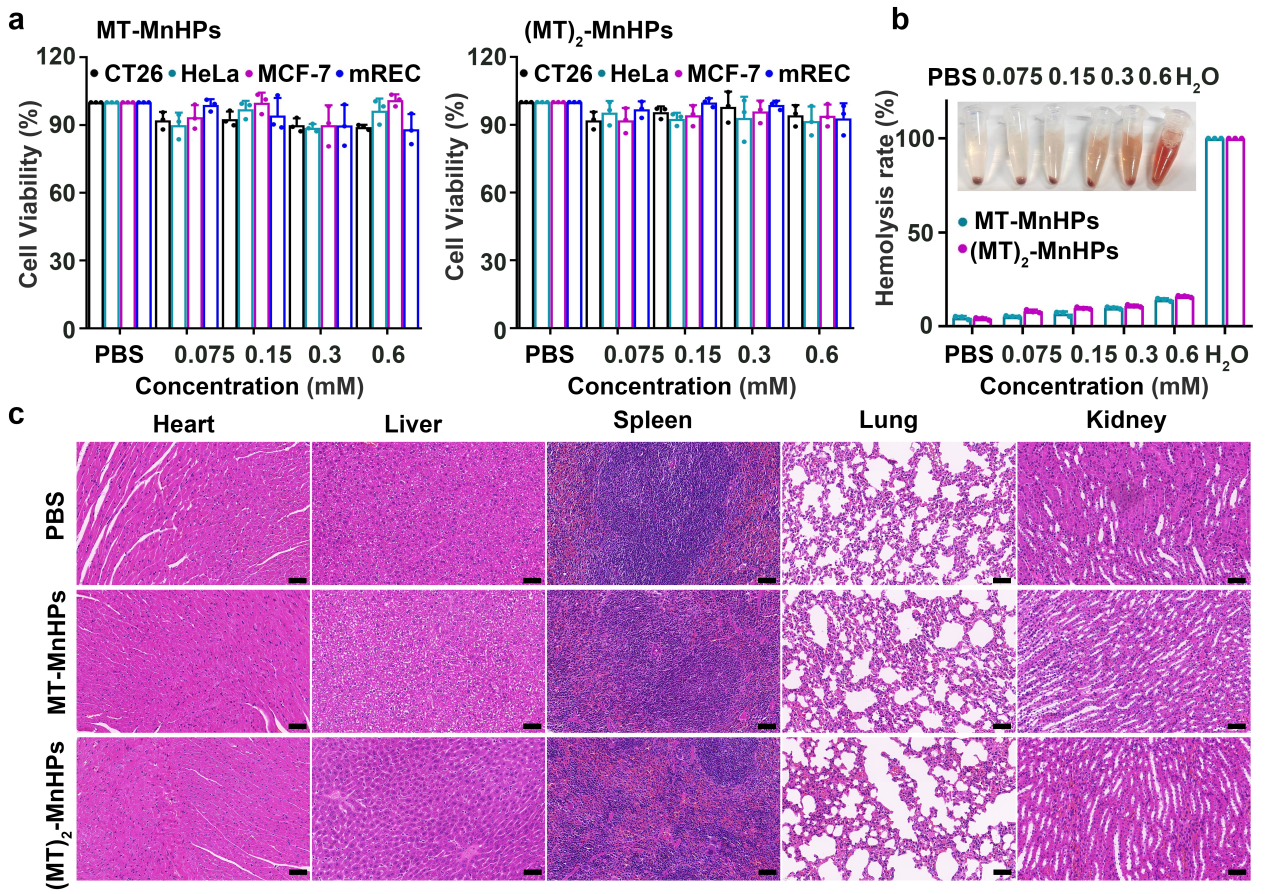


**Supplementary Fig. 28. Evaluation of the cytotoxicity of Trojan MRI contrast agents. a**, Viability of CT26, HeLa, MCF-7 and mREC cells treated with different concentrations of MT-MnHPs or (MT)2-MnHPs for 24 h. All error bars represent the standard deviation determined from three independent assays. **b**, Quantitative results and photographs of the hemolysis activity of MT-MnHPs or (MT)2-MnHPs at different concentrations. **c**, H&E staining of different organs (heart, liver, spleen, lung and kidney) of healthy mice treated with PBS, 0.3 mM MT-MnHPs or (MT)2-MnHPs for 24 h. Scale bar, 20 μm. All imaging experiments were repeated three times with similar results. The data are presented as the means ± SDs (n = 3).


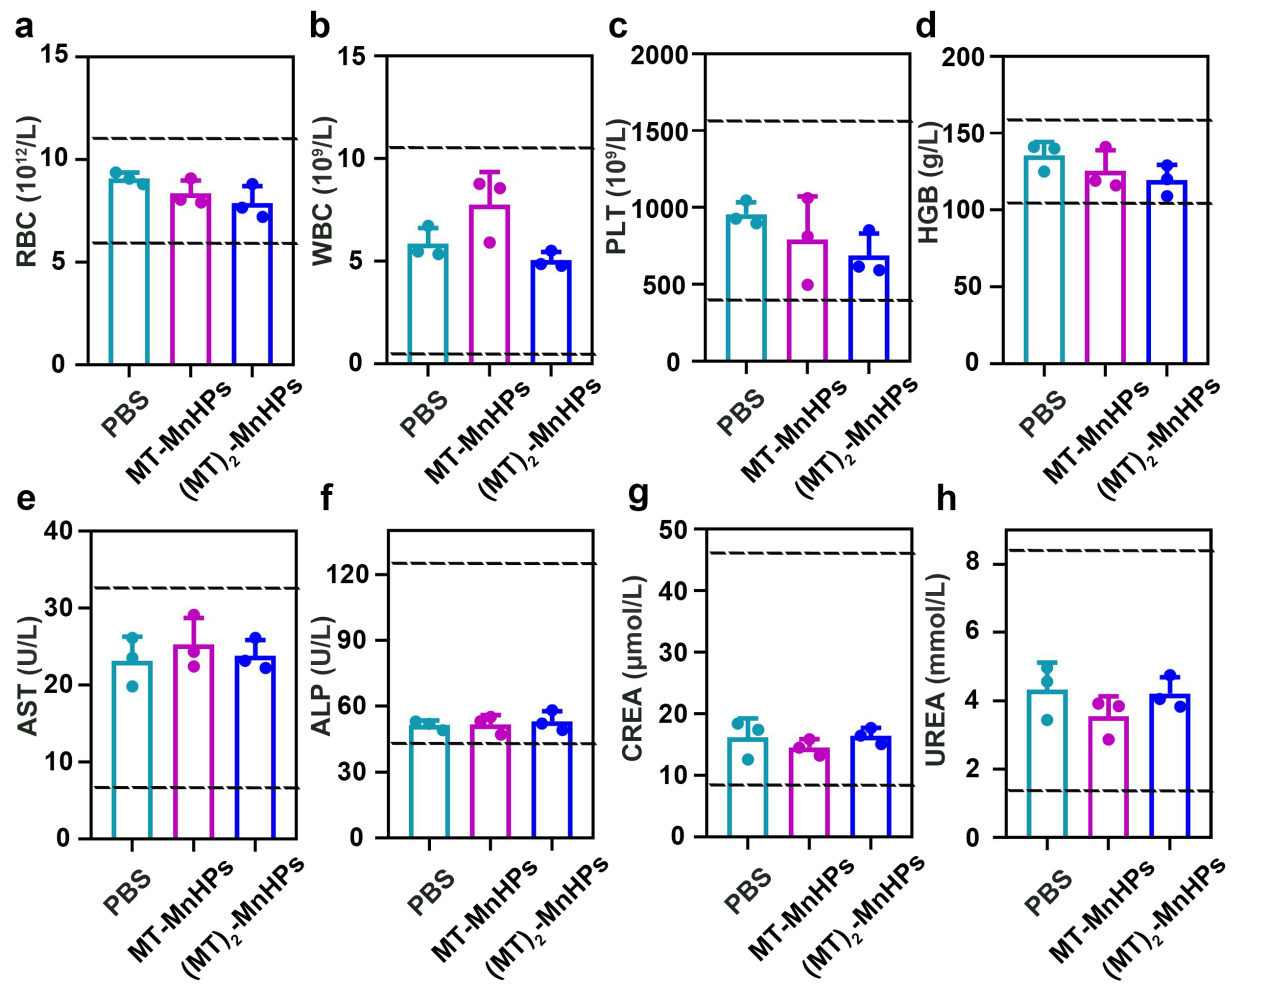


**Supplementary Fig. 29. Blood biochemical and routine analyses of healthy mice treated with PBS, MT-MnHPs or (MT)2-MnHPs for 24 h. a**, Red blood cells (RBCs). **b**, White blood cells (WBCs). **c**, Platelet (PLT). **d**, Hemoglobin (HGB). **e**, Aspartate aminotransferase (AST). **f**, Alkaline phosphatase (ALP). **g**, Creatinine (CREA). **h**, Urea (UREA). The data are presented as the means ± SDs (n = 3).


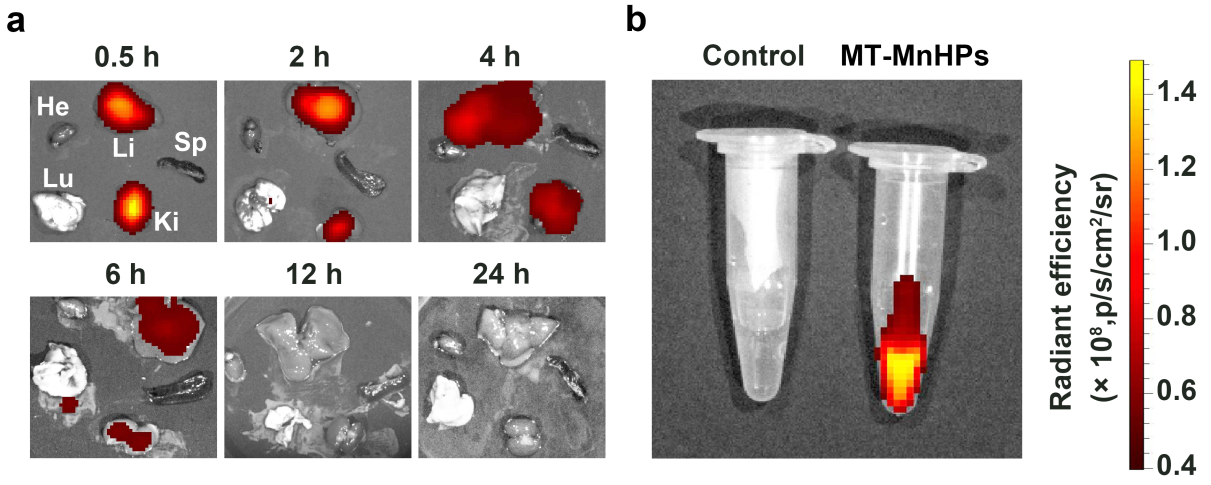


**Supplementary Fig. 30. a**,Ex vivo fluorescence imaging of organs resected from healthy mice after intravenous injection of MT-MnHPs (0.3 mM, 200 µL) at different time points.First row (from left to right): heart (He), liver (Li), and spleen (Sp); second row (from left to right): lung (Lu), and kidney (Ki). **b**,Ex vivo fluorescence imaging of urine from healthy mice treated with PBS (control) or MT-MnHPs (0.3 mM, 200 µL) 24 h postinjection. All imaging experiments were repeated three times with similar results.

**Supplementary Note 1 Confirmation of lamB knockout by Sanger sequencing**

**
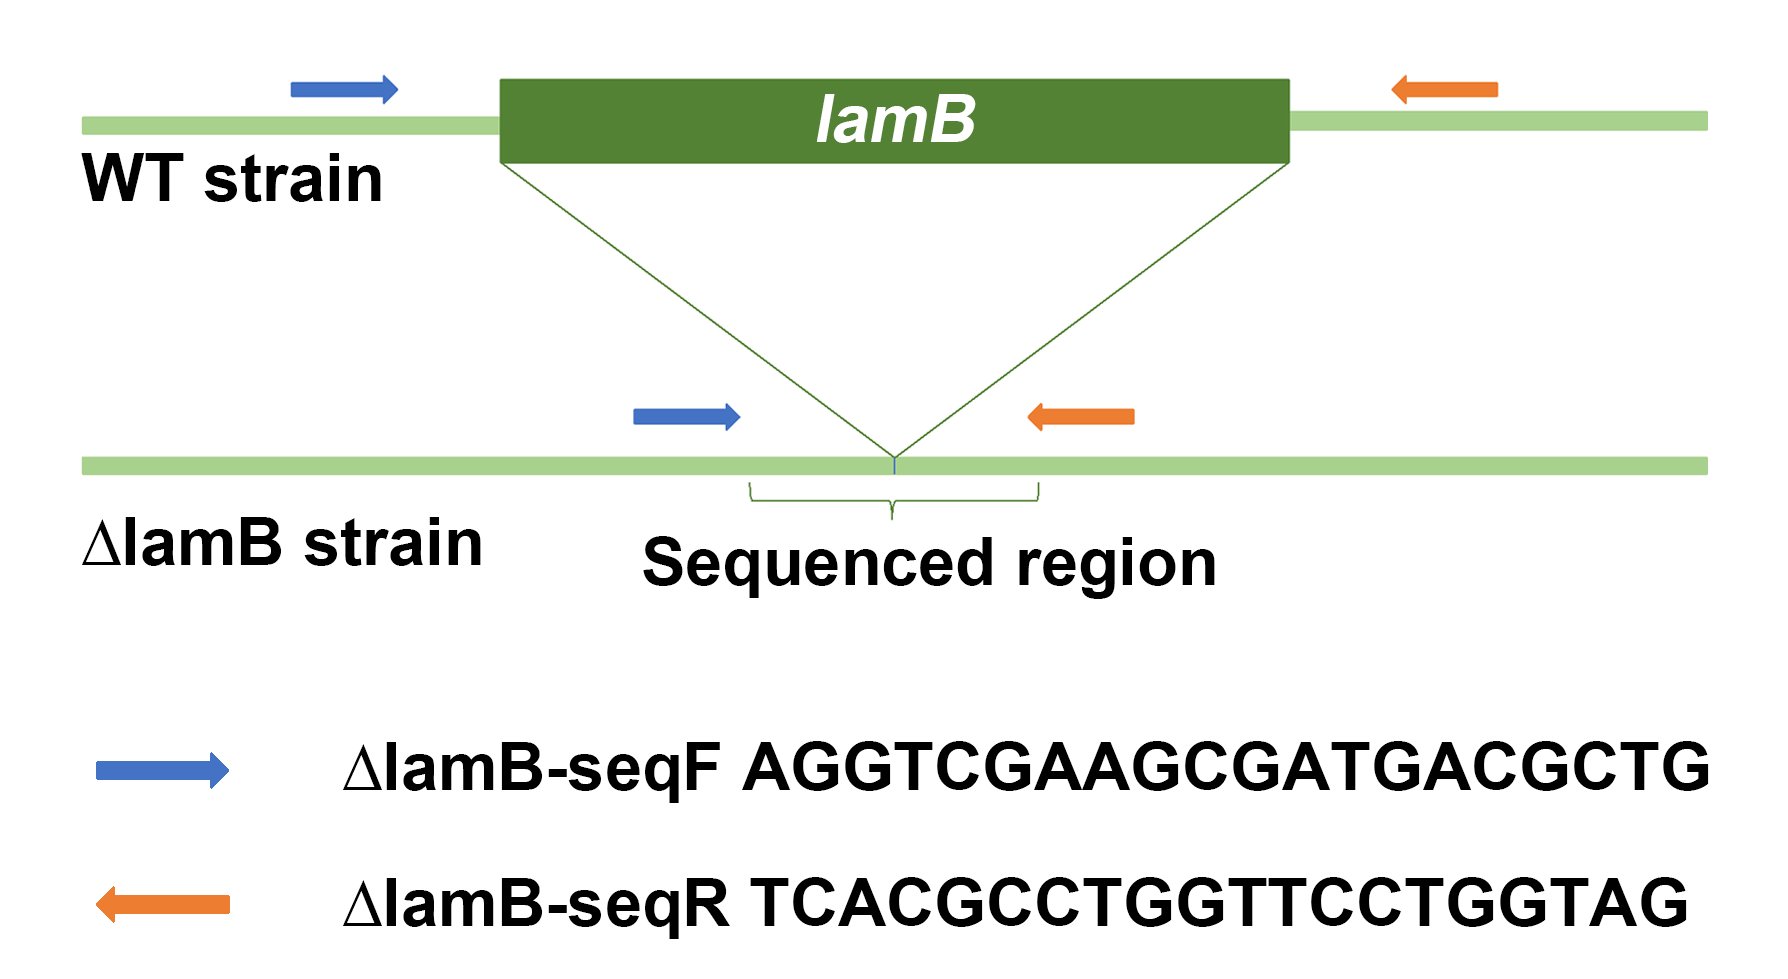
**

AAAGCCGTGATGTCCAGGTTGGAGCCAATATGTCGCTGGGTATTCGCCCGGAACATCTACTGCCGAGTGATATCGCTGACGTCATCCTTGAGGGTGAAGTTCAGGTCGTCGAGCAACTCGGCAACGAAACTCAAATCCATATCCAGATCCCTTCCATTCGTCAAAACCTGGTGTACCGCCAGAACGACGTGGTGTTGGTAGAAGAAGGTGCCACATTCGCTATCGGCCTGCCGCCAGAGCGTTGCCATCTGTTCCGTGAGGATGGCACTGCATGTCGTCGACTGCATAAGGAGCCGGGCGTTTAAGCACCCCACAAAACACACAAAGCCTGTCACAGGTGATGTGAAAAAAGAAAAGCAATGACTCAGGAGATAGATAGCAAAACCTGGGCCGGATAAGGCGTTTACGCCGCATTCGGCAACCAACGCCTGATGCGACGCTTGCGCGTCTTATCAGGCCTACAACGGCTGTCAAATGTAGGCCGGATAAGGCGTTTACGCCGCATCCGGCATAAAAACAGGTTGTCATTATCTGAAAGGGGCGAAAGCCCCTCTGATTATCGGGTTTAGCGCGCTATTGCCTGGCTACCGCTGAGCTCCAGATTTTGAGGTGAAAACAATGAAAATGAATAAAAGTCTCATCGTCCTCTGTTTATCAGCAGGGTTACTGGCAAGCGCGCCTGGAATTAGCCTTGCCGATGTTAACTACGTACCGCAAAACACCAGCGACGCGCCAGCCATTCCATCTGCTGCGCTGCAACAACTCACCTGGACACCGGTCGATCAATCT

**Supplementary Note 2 Confirmation of malE knockout by Sanger sequencing**

**
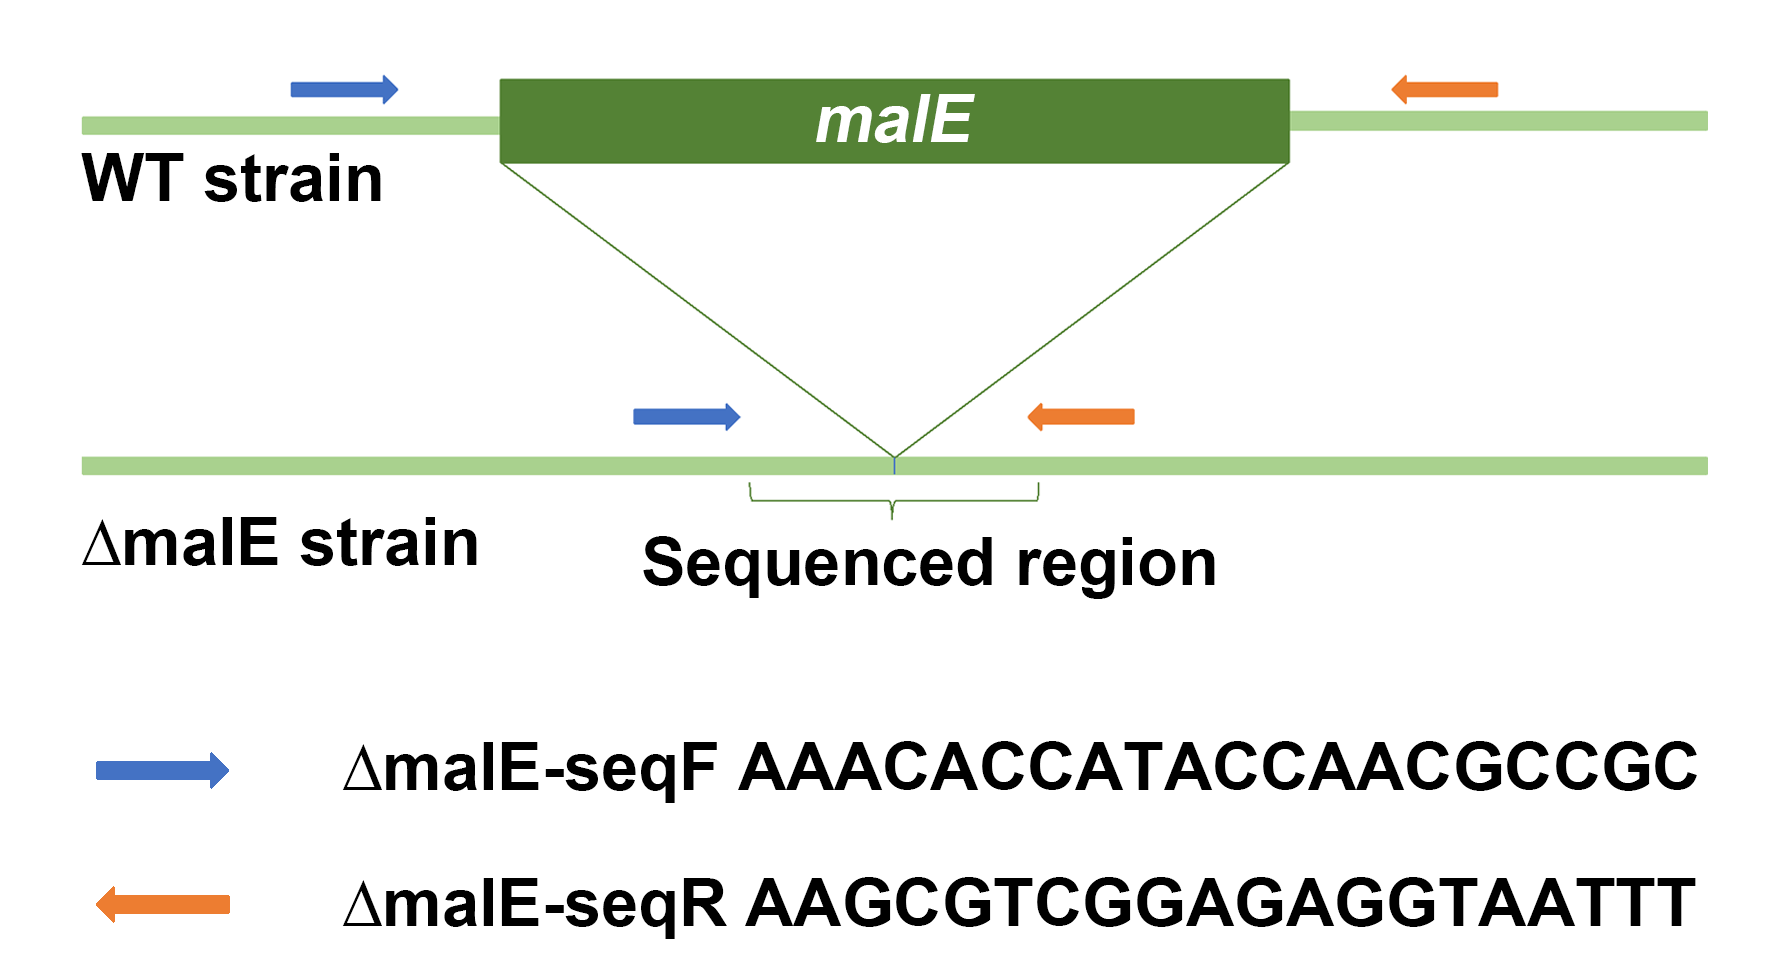
**

GCTGTACGCTCGCCATGCCCTTCTCCCTTTGTAACAACCTGTCATCGACAGCAACATTCATGATGGGCTGACTATGCGTCATCAGGAGATGGCTTAAATCCTCCACCCCCTGGCTTTTTTATGGGGGAGGAGGCGGGAGGATGAGAACACGGCTTCTGTGAACTAAACCGAGGTCATGTAAGGAATTTCGTGATGTTGCTTGCAAAAATCGTGGCGATTTTATGTGCGCATCTCCACATTACCGCCAATTCTGTAACAGAGATCACACAAAGCGACGGTGGGGCGTAGGGGCAAGGAGGATGGAAAGAGGTTGCCGTATAAAGAAACTAGAGTCCGTTTAGGTGTTTTCACGAGCACTTCACCAACAAGGACCATAGATTTGCTGTGAAATGCCGGATGCGGCGTGAACGCCTTGTCCGGCCTACAAAACCGAAACGTATGTAGGCCTGATAAGACGCGTCAGCGTCGCATCAGGCAGTTGTTGTCGGATAAGGCGTGAAAGCCTTATCCGTCCTGGAATGAGGAAGAACCCCATGGATGTCATTAAAAAGAAACATTGGTGGCAAAGCGACGCGCTGAAATGGTCAGTGCTAGGTCTGCTCGGCCTGCTGGTGGGTTACCTTGTTGTTTTAATGTACGCACAAGGGGAATACCTGTTCGCCATTACCACGCTGATATTGAGTTCAGCGGGGCTGTATATTTTCGCCAATCGTAAAGCCTACGCCTGGCGCTATGTTTACCCGGGAATGGCTGGAATGGGATTATTCGTCCTCTTCCCTCTGGTCTGCACCATCGCCATTGCCTTCACCA
